# Supplementary material
Source: publisher site journal article supplement (https://www.dovepress.com/article/269400)
Supplement: Supplementary file 1 [file get_supplementary_file.php]

**eAppendix**

[eFigure 1- Description of the Pregnancy Identification Algorithm (PIA) 2](https://uflorida-my.sharepoint.com/personal/sarayani_ufl_edu/Documents/PhD/Research%20Projects/YAAS/PIA/PIA_manuscript/Journal%20submission/ClinEpi/revision/eAppendix_clean%20version_with%20citations.docx#_Toc52099778)

[eTable 1- Diagnosis codes for live/mixed birth and delivery (ICD-9-CM) 3](#_Toc49106444)

[eTable 2- Diagnosis codes for live/mixed birth and delivery (ICD-10-CM) 25](#_Toc49106445)

[eTable 3- Procedure codes for delivery (ICD-9-CM) 36](#_Toc49106446)

[eTable 4- Procedure codes for delivery (ICD-10-PCS) 37](#_Toc49106447)

[eTable 5- Procedure codes for delivery (CPT) 38](#_Toc49106448)

[eTable 6- Stillbirth (ICD, CPT, HPCS) 40](#_Toc49106449)

[eTable 7- Induced abortion (ICD, CPT, HCPCS) 41](#_Toc49106450)

[eTable 8- Spontaneous Abortion (ICD, CPT) 43](#_Toc49106451)

[eTable 9- Ectopic pregnancy (ICD, CPT, HCPCS) 45](#_Toc49106452)

[eTable 10- Prenatal code for pregnancy with unknown outcome (ICD, CPT) 60](#_Toc49106453)

[eTable 11- Gestational age codes (ICD-9-CM, ICD-10-CM) 64](#_Toc49106454)

[eTable 12- Washout period between pregnancy episodes 69](#_Toc49106455)

[eTable 13- Pregnancy episodes identified by the Pregnancy Identification Algorithm (PIA) 71](#_Toc49106456)

[eTable 14- The demographic characteristics of the eligible cohort 72](#_Toc49106457)

[eTable 15- Pregnancy episodes identified by the Pregnancy Identification Algorithm (PIA) with standardized denominator 73](#_Toc49106458)


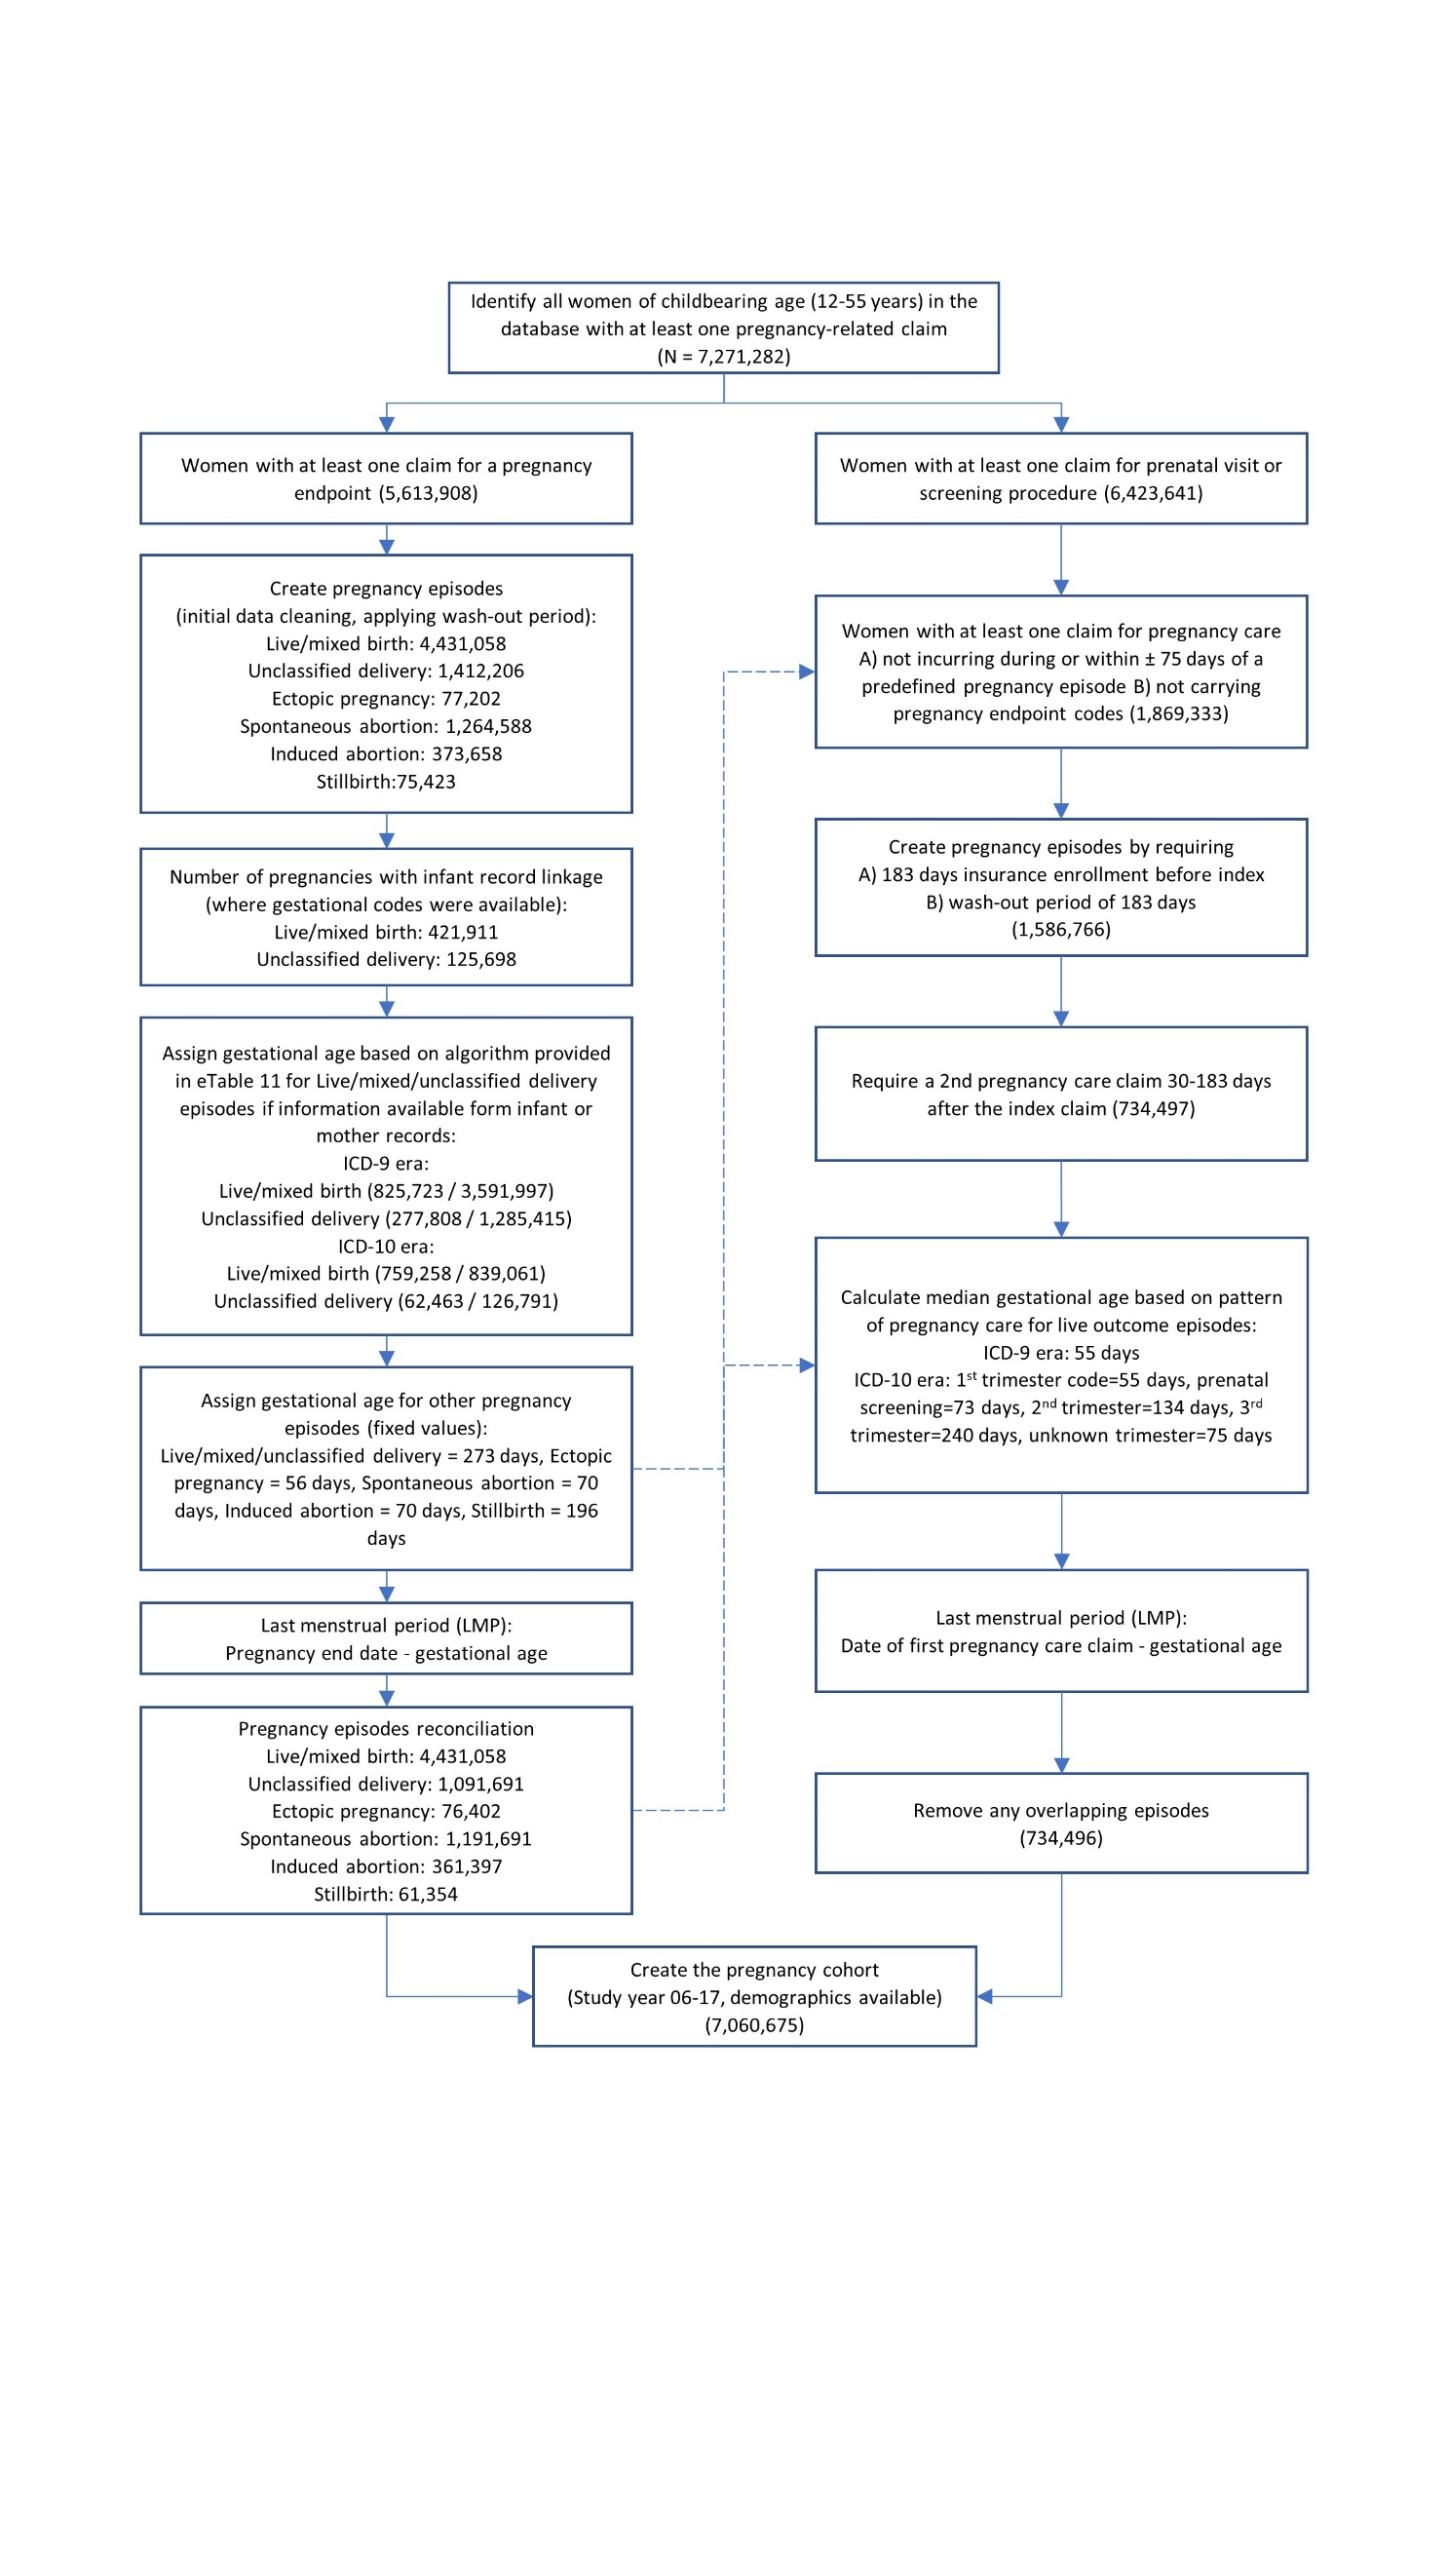


eFigure 1- Description of the Pregnancy Identification Algorithm (PIA)

eTable 1- Diagnosis codes for live/mixed birth and delivery (ICD-9-CM)

| ICD-9-CM Code | Code Description | Category |
| --- | --- | --- |
| V270x | Mother with single liveborn | Live birth |
| V272x | Mother with twins both liveborn | Live birth |
| V275x | Mother with other multiple birth all liveborn | Live birth |
| V30xx | Single liveborn | Live birth |
| V300x | Single liveborn, born in hospital | Live birth |
| V3000 | Single liveborn, born in hospital, delivered without mention of cesarean section | Live birth |
| V3001 | Single liveborn, born in hospital, delivered by cesarean section | Live birth |
| V301x | Single liveborn, born before admission to hospital | Live birth |
| V302x | Single liveborn, born outside hospital and not hospitalized | Live birth |
| V31xx | Twin birth, mate liveborn | Live birth |
| V310x | Twin, mate liveborn, born in hospital | Live birth |
| V3100 | Twin birth, mate liveborn, born in hospital, delivered without mention of cesarean section | Live birth |
| V3101 | Twin birth, mate liveborn, born in hospital, delivered by cesarean section | Live birth |
| V311x | Twin birth, mate liveborn, born before admission to hospital | Live birth |
| V312x | Twin birth, mate liveborn, born outside hospital and not hospitalized | Live birth |
| V32xx | Twin birth, mate stillborn | Live birth |
| V320x | Twin, mate stillborn, born in hospital | Live birth |
| V3200 | Twin birth, mate stillborn, born in hospital, delivered without mention of cesarean section | Live birth |
| V3201 | Twin birth, mate stillborn, born in hospital, delivered by cesarean section | Live birth |
| V321x | Twin birth, mate stillborn, born before admission to hospital | Live birth |
| V322x | Twin birth, mate stillborn, born outside hospital and not hospitalized | Live birth |
| V34xx | Other multiple birth (three or more), mates all liveborn | Live birth |
| V340x | Other multiple, mates all liveborn, born in hospital | Live birth |
| V3400 | Other multiple birth (three or more), mates all liveborn, born in hospital, delivered without mention of cesarean section | Live birth |
| V341x | Other multiple birth (three or more), mates all liveborn, born before admission to hospital | Live birth |
| V342x | Other multiple birth (three or more), mates all liveborn, born outside hospital and not hospitalized | Live birth |
| V35xx | Other multiple birth (three or more), mates all stillborn | Live birth |
| V350x | Other multiple, mates all stillborn, born in hospital | Live birth |
| V3500 | Other multiple birth (three or more), mates all still born, born in hospital, delivered without mention of cesarean section | Live birth |
| V3501 | Other multiple birth (three or more), mates all still born, born in hospital, delivered by cesarean section | Live birth |
| V351x | Other multiple birth (three or more), mates all stillborn, born before admission to hospital | Live birth |
| V352x | Other multiple birth (three or more), mates all stillborn, born outside of hospital and not hospitalized | Live birth |
| V36xx | Other multiple birth (three or more), mates liveborn and stillborn | Live birth |
| V360x | Other multiple, mates liveborn and stillborn, born in hospital | Live birth |
| V3600 | Other multiple birth (three or more), mates liveborn and stillborn, born in hospital, delivered without mention of cesarean section | Live birth |
| V3601 | =B38irth (three or more), mates liveborn and stillborn, born in hospital, delivered without mention of cesarean section | Live birth |
| V361x | Other multiple birth (three or more), mates liveborn and stillborn, born before admission to hospital | Live birth |
| V362x | Other multiple birth (three or more), mates liveborn and stillborn, born outside hospital and not hospitalized | Live birth |
| V37xx | Other multiple birth (three or more), unspecified whether mates liveborn or stillborn | Live birth |
| V370x | Other multiple, unspecified, born in hospital | Live birth |
| V3700 | Other multiple birth (three or more), unspecified whether mates liveborn or stillborn, born in hospital, delivered without mention of cesarean section | Live birth |
| V3701 | Other multiple birth (three or more), unspecified whether mates liveborn or stillborn, born in hospital, delivered by cesarean section | Live birth |
| V371x | Other multiple birth (three or more), unspecified whether mates liveborn or stillborn, born before admission to hospital | Live birth |
| V372x | Other multiple birth (three or more), unspecified whether mates liveborn or stillborn, born outside of hospital | Live birth |
| V39xx | Liveborn, unspecified whether single, twin, or multiple | Live birth |
| V390x | Other liveborn, unspecified, born in hospital | Live birth |
| V3900 | Liveborn, unspecified whether single, twin or multiple, born in hospital, delivered without mention of cesarean section | Live birth |
| V3901 | Liveborn, unspecified whether single, twin or multiple, born in hospital, delivered by cesarean section | Live birth |
| V391x | Liveborn, unspecified whether single, twin or multiple, born before admission to hospital | Live birth |
| V392x | Liveborn, unspecified whether single, twin or multiple, born outside hospital and not hospitalized | Live birth |
| V273x | Mother with twins one liveborn and one stillborn | Mixed delivery |
| V276x | Mother with other multiple birth some liveborn | Mixed delivery |
| V33xx | Twin birth, unspecified whether mate liveborn or stillborn | Unclassified Delivery |
| V330x | Twin, unspecified, born in hospital | Unclassified Delivery |
| V3300 | Twin birth, unspecified whether mate liveborn or stillborn, born in hospital, delivered without mention of cesarean section | Unclassified Delivery |
| V331x | Twin birth, unspecified whether mate liveborn or stillborn, born before admission to hospital | Unclassified Delivery |
| V332x | Twin birth, unspecified whether mate liveborn or stillborn, born outside hospital and not hospitalized | Unclassified Delivery |
| 64101 | Placenta previa without hemorrhage, delivered, with or without mention of antepartum condition | Unclassified Delivery |
| 64111 | Hemorrhage from placenta previa, delivered, with or without mention of antepartum condition | Unclassified Delivery |
| 64121 | Premature separation of placenta, delivered, with or without mention of antepartum condition | Unclassified Delivery |
| 64131 | Antepartum hemorrhage associated with coagulation defects, delivered, with or without mention of antepartum condition | Unclassified Delivery |
| 64181 | Other antepartum hemorrhage, delivered, with or without mention of antepartum condition | Unclassified Delivery |
| 64191 | Unspecified antepartum hemorrhage, delivered, with or without mention of antepartum condition | Unclassified Delivery |
| 64201 | Benign essential hypertension complicating pregnancy, childbirth, and the puerperium, delivered, with or without mention of antepartum condition | Unclassified Delivery |
| 64202 | Benign essential hypertension, complicating pregnancy, childbirth, and the puerperium, delivered, with mention of postpartum complication | Unclassified Delivery |
| 64211 | Hypertension secondary to renal disease, complicating pregnancy, childbirth, and the puerperium, delivered, with or without mention of antepartum condition | Unclassified Delivery |
| 64212 | Hypertension secondary to renal disease, complicating pregnancy, childbirth, and the puerperium, delivered, with mention of postpartum complication | Unclassified Delivery |
| 64221 | Other pre-existing hypertension, complicating pregnancy, childbirth, and the puerperium, delivered, with or without mention of antepartum condition | Unclassified Delivery |
| 64222 | Other pre-existing hypertension, complicating pregnancy, childbirth, and the puerperium, delivered, with mention of postpartum complication | Unclassified Delivery |
| 64231 | Transient hypertension of pregnancy, delivered , with or without mention of antepartum condition | Unclassified Delivery |
| 64232 | Transient hypertension of pregnancy, delivered, with mention of postpartum complication | Unclassified Delivery |
| 64241 | Mild or unspecified pre-eclampsia, delivered, with or without mention of antepartum condition | Unclassified Delivery |
| 64242 | Mild or unspecified pre-eclampsia, delivered, with mention of postpartum complication | Unclassified Delivery |
| 64251 | Severe pre-eclampsia, delivered, with or without mention of antepartum condition | Unclassified Delivery |
| 64252 | Severe pre-eclampsia, delivered, with mention of postpartum complication | Unclassified Delivery |
| 64261 | Eclampsia, delivered, with or without mention of antepartum condition | Unclassified Delivery |
| 64262 | Eclampsia, delivered, with mention of postpartum complication | Unclassified Delivery |
| 64271 | Pre-eclampsia or eclampsia superimposed on pre-existing hypertension, delivered, with or without mention of antepartum condition | Unclassified Delivery |
| 64272 | Pre-eclampsia or eclampsia superimposed on pre-existing hypertension, delivered, with mention of postpartum complication | Unclassified Delivery |
| 64291 | Unspecified hypertension complicating pregnancy, childbirth, or the puerperium, delivered, with or without mention of antepartum condition | Unclassified Delivery |
| 64292 | Unspecified hypertension complicating pregnancy, childbirth, or the puerperium, delivered, with mention of postpartum complication | Unclassified Delivery |
| 64301 | Mild hyperemesis gravidarum, delivered, with or without mention of antepartum condition | Unclassified Delivery |
| 64311 | Hyperemesis gravidarum with metabolic disturbance, delivered, with or without mention of antepartum condition | Unclassified Delivery |
| 64321 | Late vomiting of pregnancy, delivered, with or without mention of antepartum condition | Unclassified Delivery |
| 64381 | Other vomiting complicating pregnancy, delivered, with or without mention of antepartum condition | Unclassified Delivery |
| 64391 | Unspecified vomiting of pregnancy, delivered, with or without mention of antepartum condition | Unclassified Delivery |
| 64421 | Early onset of delivery, delivered, with or without mention of antepartum condition | Unclassified Delivery |
| 64511 | Post term pregnancy, delivered, with or without mention of antepartum condition | Unclassified Delivery |
| 64521 | Prolonged pregnancy, delivered, with or without mention of antepartum condition | Unclassified Delivery |
| 64601 | Papyraceous fetus, delivered, with or without mention of antepartum condition | Unclassified Delivery |
| 64611 | Edema or excessive weight gain in pregnancy, without mention of hypertension, delivered, with or without mention of antepartum complication | Unclassified Delivery |
| 64612 | Edema or excessive weight gain in pregnancy, without mention of hypertension, delivered, with mention of postpartum complication | Unclassified Delivery |
| 64621 | Unspecified renal disease in pregnancy, without mention of hypertension, delivered, with or without mention of antepartum condition | Unclassified Delivery |
| 64622 | Unspecified renal disease in pregnancy, without mention of hypertension, delivered, with mention of postpartum complication | Unclassified Delivery |
| 64631 | Recurrent pregnancy loss, delivered, with or without mention of antepartum condition | Unclassified Delivery |
| 64641 | Peripheral neuritis in pregnancy, delivered, with or without mention of antepartum condition | Unclassified Delivery |
| 64642 | Peripheral neuritis in pregnancy, delivered, with mention of postpartum complication | Unclassified Delivery |
| 64651 | Asymptomatic bacteriuria in pregnancy, delivered, with or without mention of antepartum condition | Unclassified Delivery |
| 64652 | Asymptomatic bacteriuria in pregnancy, delivered, with mention of postpartum complication | Unclassified Delivery |
| 64661 | Infections of genitourinary tract in pregnancy, delivered, with or without mention of antepartum condition | Unclassified Delivery |
| 64662 | Infections of genitourinary tract in pregnancy, delivered, with mention of postpartum complication | Unclassified Delivery |
| 64671 | Liver and biliary tract disorders in pregnancy, delivered, with or without mention of antepartum condition | Unclassified Delivery |
| 64681 | Other specified complications of pregnancy, delivered, with or without mention of antepartum condition | Unclassified Delivery |
| 64682 | Other specified complications of pregnancy, delivered, with mention of postpartum complication | Unclassified Delivery |
| 64691 | Unspecified complication of pregnancy, delivered, with or without mention of antepartum condition | Unclassified Delivery |
| 64701 | Syphilis of mother, complicating pregnancy, childbirth, or the puerperium, delivered, with or without mention of antepartum condition | Unclassified Delivery |
| 64702 | Syphilis of mother, complicating pregnancy, childbirth, or the puerperium, delivered, with mention of postpartum complication | Unclassified Delivery |
| 64711 | Gonorrhea of mother, complicating pregnancy, childbirth, or the puerperium, delivered, with or without mention of antepartum condition | Unclassified Delivery |
| 64712 | Gonorrhea of mother, complicating pregnancy, childbirth, or the puerperium, delivered, with mention of postpartum complication | Unclassified Delivery |
| 64731 | Tuberculosis of mother, complicating pregnancy, childbirth, or the puerperium, delivered, with or without mention of antepartum condition | Unclassified Delivery |
| 64732 | Tuberculosis of mother, complicating pregnancy, childbirth, or the puerperium, delivered, with mention of postpartum complication | Unclassified Delivery |
| 64741 | Malaria in the mother, delivered, with or without mention of antepartum condition | Unclassified Delivery |
| 64742 | Malaria in the mother, delivered, with mention of postpartum complication | Unclassified Delivery |
| 64751 | Rubella in the mother, delivered, with or without mention of antepartum condition | Unclassified Delivery |
| 64752 | Rubella in the mother, delivered, with mention of postpartum complication | Unclassified Delivery |
| 64761 | Other viral diseases in the mother, delivered, with or without mention of antepartum condition | Unclassified Delivery |
| 64762 | Other viral diseases in the mother, delivered, with mention of postpartum complication | Unclassified Delivery |
| 64781 | Other specified infectious and parasitic diseases of mother, delivered, with or without mention of antepartum condition | Unclassified Delivery |
| 64782 | Other specified infectious and parasitic diseases of mother, delivered, with mention of postpartum complication | Unclassified Delivery |
| 64791 | Unspecified infection or infestation of mother, delivered, with or without mention of antepartum condition | Unclassified Delivery |
| 64792 | Unspecified infection or infestation of mother, delivered, with mention of postpartum complication | Unclassified Delivery |
| 64801 | Diabetes mellitus of mother, complicating pregnancy, childbirth, or the puerperium, delivered, with or without mention of antepartum condition | Unclassified Delivery |
| 64802 | Diabetes mellitus of mother, complicating pregnancy, childbirth, or the puerperium, delivered, with mention of postpartum complication | Unclassified Delivery |
| 64811 | Thyroid dysfunction of mother, delivered, with or without mention of antepartum condition | Unclassified Delivery |
| 64812 | Thyroid dysfunction of mother, delivered, with mention of postpartum complication | Unclassified Delivery |
| 64821 | Anemia of mother, delivered, with or without mention of antepartum condition | Unclassified Delivery |
| 64822 | Anemia of mother, delivered, with mention of postpartum complication | Unclassified Delivery |
| 64831 | Drug dependence of mother, delivered, with or without mention of antepartum condition | Unclassified Delivery |
| 64832 | Drug dependence of mother, delivered, with mention of postpartum complication | Unclassified Delivery |
| 64841 | Mental disorders of mother, delivered, with or without mention of antepartum condition | Unclassified Delivery |
| 64842 | Mental disorders of mother, delivered, with mention of postpartum complication | Unclassified Delivery |
| 64851 | Congenital cardiovascular disorders of mother, delivered, with or without mention of antepartum condition | Unclassified Delivery |
| 64852 | Congenital cardiovascular disorders of mother, delivered, with mention of postpartum complication | Unclassified Delivery |
| 64861 | Other cardiovascular diseases of mother, delivered, with or without mention of antepartum condition | Unclassified Delivery |
| 64862 | Other cardiovascular diseases of mother, delivered, with mention of postpartum complication | Unclassified Delivery |
| 64871 | Bone and joint disorders of back, pelvis, and lower limbs of mother, delivered, with or without mention of antepartum condition | Unclassified Delivery |
| 64872 | Bone and joint disorders of back, pelvis, and lower limbs of mother, delivered, with mention of postpartum complication | Unclassified Delivery |
| 64881 | Abnormal glucose tolerance of mother, delivered, with or without mention of antepartum condition | Unclassified Delivery |
| 64882 | Abnormal glucose tolerance of mother, delivered, with mention of postpartum complication | Unclassified Delivery |
| 64891 | Other current conditions classifiable elsewhere of mother, delivered, with or without mention of antepartum condition | Unclassified Delivery |
| 64892 | Other current conditions classifiable elsewhere of mother, delivered, with mention of postpartum complication | Unclassified Delivery |
| 64901 | Tobacco use disorder complicating pregnancy, childbirth, or the puerperium, delivered, with or without mention of antepartum condition | Unclassified Delivery |
| 64902 | Tobacco use disorder complicating pregnancy, childbirth, or the puerperium, delivered, with mention of postpartum complication | Unclassified Delivery |
| 64911 | Obesity complicating pregnancy, childbirth, or the puerperium, delivered, with or without mention of antepartum condition | Unclassified Delivery |
| 64912 | Obesity complicating pregnancy, childbirth, or the puerperium, delivered, with mention of postpartum complication | Unclassified Delivery |
| 64921 | Bariatric surgery status complicating pregnancy, childbirth, or the puerperium, delivered, with or without mention of antepartum condition | Unclassified Delivery |
| 64922 | Bariatric surgery status complicating pregnancy, childbirth, or the puerperium, delivered, with mention of postpartum complication | Unclassified Delivery |
| 64931 | Coagulation defects complicating pregnancy, childbirth, or the puerperium, delivered, with or without mention of antepartum condition | Unclassified Delivery |
| 64932 | Coagulation defects complicating pregnancy, childbirth, or the puerperium, delivered, with mention of postpartum complication | Unclassified Delivery |
| 64941 | Epilepsy complicating pregnancy, childbirth, or the puerperium, delivered, with or without mention of antepartum condition | Unclassified Delivery |
| 64942 | Epilepsy complicating pregnancy, childbirth, or the puerperium, delivered, with mention of postpartum complication | Unclassified Delivery |
| 64951 | Spotting complicating pregnancy, delivered, with or without mention of antepartum condition | Unclassified Delivery |
| 64971 | Cervical shortening, delivered, with or without mention of antepartum condition | Unclassified Delivery |
| 650 | Normal delivery | Unclassified Delivery |
| 65101 | Twin pregnancy, delivered, with or without mention of antepartum condition | Unclassified Delivery |
| 65111 | Triplet pregnancy, delivered, with or without mention of antepartum condition | Unclassified Delivery |
| 65121 | Quadruplet pregnancy, delivered, with or without mention of antepartum condition | Unclassified Delivery |
| 65131 | Twin pregnancy with fetal loss and retention of one fetus, delivered, with or without mention of antepartum condition | Unclassified Delivery |
| 65141 | Triplet pregnancy with fetal loss and retention of one or more fetus(es), delivered, with or without mention of antepartum condition | Unclassified Delivery |
| 65151 | Quadruplet pregnancy with fetal loss and retention of one or more fetus(es), delivered, with or without mention of antepartum condition | Unclassified Delivery |
| 65161 | Other multiple pregnancy with fetal loss and retention of one or more fetus(es), delivered, with or without mention of antepartum condition | Unclassified Delivery |
| 65171 | Multiple gestation following (elective) fetal reduction,delivered, with or without mention of antepartum condition | Unclassified Delivery |
| 65181 | Other specified multiple gestation, delivered, with or without mention of antepartum condition | Unclassified Delivery |
| 65191 | Unspecified multiple gestation, delivered, with or without mention of antepartum condition | Unclassified Delivery |
| 65201 | Unstable lie, delivered, with or without mention of antepartum condition | Unclassified Delivery |
| 65211 | Breech or other malpresentation successfully converted to cephalic presentation, delivered, with or without mention of antepartum condition | Unclassified Delivery |
| 65221 | Breech presentation without mention of version, delivered, with or without mention of antepartum condition | Unclassified Delivery |
| 65231 | Transverse or oblique presentation, delivered, with or without mention of antepartum condition | Unclassified Delivery |
| 65241 | Face or brow presentation, delivered, with or without mention of antepartum condition | Unclassified Delivery |
| 65251 | High head at term, delivered, with or without mention of antepartum condition | Unclassified Delivery |
| 65261 | Multiple gestation with malpresentation of one fetus or more, delivered, with or without mention of antepartum condition | Unclassified Delivery |
| 65271 | Prolapsed arm of fetus, delivered, with or without mention of antepartum condition | Unclassified Delivery |
| 65281 | Other specified malposition or malpresentation, delivered, with or without mention of antepartum condition | Unclassified Delivery |
| 65291 | Unspecified malposition or malpresentation, delivered, with or without mention of antepartum condition | Unclassified Delivery |
| 65301 | Major abnormality of bony pelvis, not further specified, delivered, with or without mention of antepartum condition | Unclassified Delivery |
| 65311 | Generally contracted pelvis, delivered, with or without mention of antepartum condition | Unclassified Delivery |
| 65321 | Inlet contraction of pelvis, delivered, with or without mention of antepartum condition | Unclassified Delivery |
| 65331 | Outlet contraction of pelvis, delivered, with or without mention of antepartum condition | Unclassified Delivery |
| 65341 | Fetopelvic disproportion, delivered, with or without mention of antepartum condition | Unclassified Delivery |
| 65351 | Unusually large fetus causing disproportion, delivered, with or without mention of antepartum condition | Unclassified Delivery |
| 65361 | Hydrocephalic fetus causing disproportion, delivered, with or without mention of antepartum condition | Unclassified Delivery |
| 65371 | Other fetal abnormality causing disproportion, delivered, with or without mention of antepartum condition | Unclassified Delivery |
| 65381 | Disproportion of other origin, delivered, with or without mention of antepartum condition | Unclassified Delivery |
| 65391 | Unspecified disproportion, delivered, with or without mention of antepartum condition | Unclassified Delivery |
| 65401 | Congenital abnormalities of uterus, delivered, with or without mention of antepartum condition | Unclassified Delivery |
| 65402 | Congenital abnormalities of uterus, delivered, with mention of postpartum complication | Unclassified Delivery |
| 65411 | Tumors of body of uterus, delivered, with or without mention of antepartum condition | Unclassified Delivery |
| 65412 | Tumors of body of uterus, delivered, with mention of postpartum complication | Unclassified Delivery |
| 65421 | Previous cesarean delivery, delivered, with or without mention of antepartum condition | Unclassified Delivery |
| 65431 | Retroverted and incarcerated gravid uterus, delivered, with mention of antepartum condition | Unclassified Delivery |
| 65432 | Retroverted and incarcerated gravid uterus, delivered, with mention of postpartum complication | Unclassified Delivery |
| 65451 | Cervical incompetence, delivered, with or without mention of antepartum condition | Unclassified Delivery |
| 65452 | Cervical incompetence, delivered, with mention of postpartum complication | Unclassified Delivery |
| 65461 | Other congenital or acquired abnormality of cervix, delivered, with or without mention of antepartum condition | Unclassified Delivery |
| 65462 | Other congenital or acquired abnormality of cervix, delivered, with mention of postpartum complication | Unclassified Delivery |
| 65471 | Congenital or acquired abnormality of vagina, delivered, with or without mention of antepartum condition | Unclassified Delivery |
| 65472 | Congenital or acquired abnormality of vagina, delivered, with mention of postpartum complication | Unclassified Delivery |
| 65481 | Congenital or acquired abnormality of vulva, delivered, with or without mention of antepartum condition | Unclassified Delivery |
| 65482 | Congenital or acquired abnormality of vulva, delivered, with mention of postpartum complication | Unclassified Delivery |
| 65491 | Other and unspecified abnormality of organs and soft tissues of pelvis, delivered, with or without mention of antepartum condition | Unclassified Delivery |
| 65492 | Other and unspecified abnormality of organs and soft tissues of pelvis, delivered, with mention of postpartum complication | Unclassified Delivery |
| 65501 | Central nervous system malformation in fetus, delivered, with or without mention of antepartum condition | Unclassified Delivery |
| 65511 | Chromosomal abnormality in fetus, affecting management of mother, delivered, with or without mention of antepartum condition | Unclassified Delivery |
| 65521 | Hereditary disease in family possibly affecting fetus, affecting management of mother, delivered, with or without mention of antepartum condition | Unclassified Delivery |
| 65531 | Suspected damage to fetus from viral disease in the mother, affecting management of mother, delivered, with or without mention of antepartum condition | Unclassified Delivery |
| 65541 | Suspected damage to fetus from other disease in the mother, affecting management of mother, delivered, with or without mention of antepartum condition | Unclassified Delivery |
| 65551 | Suspected damage to fetus from drugs, affecting management of mother, delivered, with or without mention of antepartum condition | Unclassified Delivery |
| 65561 | Suspected damage to fetus from radiation, affecting management of mother, delivered, | Unclassified Delivery |
| 65571 | Decreased fetal movements, affecting management of mother, delivered, with or without mention of antepartum condition | Unclassified Delivery |
| 65581 | Other known or suspected fetal abnormality, not elsewhere classified, affecting management of mother, delivered, with or without mention of antepartum condition | Unclassified Delivery |
| 65591 | Unspecified suspected fetal abnormality, affecting management of mother, delivered, with or without mention of antepartum condition | Unclassified Delivery |
| 65601 | Fetal-maternal hemorrhage, delivered, with or without mention of antepartum condition | Unclassified Delivery |
| 65611 | Rhesus isoimmunization, delivered, with or without mention of antepartum condition | Unclassified Delivery |
| 65621 | Isoimmunization from other and unspecified blood-group incompatibility, delivered, with or without mention of antepartum condition | Unclassified Delivery |
| 65631 | Fetal distress, affecting management of mother, delivered, with or without mention of antepartum condition | Unclassified Delivery |
| 65651 | Poor fetal growth, affecting management of mother, delivered, with or without mention of antepartum condition | Unclassified Delivery |
| 65661 | Excessive fetal growth, affecting management of mother, delivered, with or without mention of antepartum condition | Unclassified Delivery |
| 65671 | Other placental conditions, affecting management of mother, delivered, with or without mention of antepartum condition | Unclassified Delivery |
| 65681 | Other specified fetal and placental problems, affecting management of mother, delivered, with or without mention of antepartum condition | Unclassified Delivery |
| 65691 | Unspecified fetal and placental problem, affecting management of mother, delivered, with or without mention of antepartum condition | Unclassified Delivery |
| 65701 | Polyhydramnios, delivered, with or without mention of antepartum condition | Unclassified Delivery |
| 65801 | Oligohydramnios, delivered, with or without mention of antepartum condition | Unclassified Delivery |
| 65811 | Premature rupture of membranes, delivered, with or without mention of antepartum condition | Unclassified Delivery |
| 65821 | Delayed delivery after spontaneous or unspecified rupture of membranes, delivered, with or without mention of antepartum condition | Unclassified Delivery |
| 65831 | Delayed delivery after artificial rupture of membranes, delivered, with or without mention of antepartum condition | Unclassified Delivery |
| 65841 | Infection of amniotic cavity, delivered, with or without mention of antepartum condition | Unclassified Delivery |
| 65881 | Other problems associated with amniotic cavity and membranes, delivered, with or without mention of antepartum condition | Unclassified Delivery |
| 65891 | Unspecified problem associated with amniotic cavity and membranes, delivered, with or without mention of antepartum condition | Unclassified Delivery |
| 65901 | Failed mechanical induction of labor, delivered, with or without mention of antepartum condition | Unclassified Delivery |
| 65911 | Failed medical or unspecified induction of labor, delivered, with or without mention of antepartum condition | Unclassified Delivery |
| 65921 | Maternal pyrexia during labor, unspecified, delivered, with or without mention of antepartum condition | Unclassified Delivery |
| 65931 | Generalized infection during labor, delivered, with or without mention of antepartum condition | Unclassified Delivery |
| 65941 | Grand multiparity, delivered, with or without mention of antepartum condition | Unclassified Delivery |
| 65951 | Elderly primigravida, delivered, with or without mention of antepartum condition | Unclassified Delivery |
| 65961 | Elderly multigravida, delivered with or without mention of antepartum condition | Unclassified Delivery |
| 65971 | Abnormality in fetal heart rate or rhythm, delivered, with or without mention of antepartum condition | Unclassified Delivery |
| 65981 | Other specified indications for care or intervention related to labor and delivery, delivered, with or without mention of antepartum condition | Unclassified Delivery |
| 65991 | Unspecified indication for care or intervention related to labor and delivery, delivered, with or without mention of antepartum condition | Unclassified Delivery |
| 66001 | Obstruction caused by malposition of fetus at onset of labor, delivered, with or without mention of antepartum condition | Unclassified Delivery |
| 66011 | Obstruction by bony pelvis during labor, delivered, with or without mention of antepartum condition | Unclassified Delivery |
| 66021 | Obstruction by abnormal pelvic soft tissues during labor, delivered, with or without mention of antepartum condition | Unclassified Delivery |
| 66031 | Deep transverse arrest and persistent occipitoposterior position, delivered, with or without mention of antepartum condition | Unclassified Delivery |
| 66041 | Shoulder (girdle) dystocia, delivered, with or without mention of antepartum condition | Unclassified Delivery |
| 66051 | Locked twins, delivered, with or without mention of antepartum condition | Unclassified Delivery |
| 66061 | Unspecified failed trial of labor, delivered, with or without mention of antepartum condition | Unclassified Delivery |
| 66071 | Failed forceps or vacuum extractor, unspecified, delivered, with or without mention of antepartum condition | Unclassified Delivery |
| 66081 | Other causes of obstructed labor, delivered, with or without mention of antepartum condition | Unclassified Delivery |
| 66091 | Unspecified obstructed labor, delivered, with or without mention of antepartum condition | Unclassified Delivery |
| 66101 | Primary uterine inertia, delivered, with or without mention of antepartum condition | Unclassified Delivery |
| 66111 | Secondary uterine inertia, delivered, with or without mention of antepartum condition | Unclassified Delivery |
| 66121 | Other and unspecified uterine inertia, delivered, with or without mention of antepartum condition | Unclassified Delivery |
| 66131 | Precipitate labor, delivered, with or without mention of antepartum condition | Unclassified Delivery |
| 66141 | Hypertonic, incoordinate, or prolonged uterine contractions, delivered, with or without mention of antepartum condition | Unclassified Delivery |
| 66191 | Unspecified abnormality of labor, delivered, with or without mention of antepartum condition | Unclassified Delivery |
| 66201 | Prolonged first stage of labor, delivered, with or without mention of antepartum condition | Unclassified Delivery |
| 66211 | Unspecified prolonged labor, delivered, with or without mention of antepartum condition | Unclassified Delivery |
| 66221 | Prolonged second stage of labor, delivered, with or without mention of antepartum condition | Unclassified Delivery |
| 66231 | Delayed delivery of second twin, triplet, etc., delivered, with or without mention of antepartum condition | Unclassified Delivery |
| 66301 | Prolapse of cord complicating labor and delivery, delivered, with or without mention of antepartum condition | Unclassified Delivery |
| 66311 | Cord around neck, with compression, complicating labor and delivery, delivered, with or without mention of antepartum condition | Unclassified Delivery |
| 66321 | Other and unspecified cord entanglement, with compression, complicating labor and delivery, delivered, with or without mention of antepartum condition | Unclassified Delivery |
| 66331 | Other and unspecified cord entanglement, without mention of compression, complicating labor and delivery, delivered, with or without mention of antepartum condition | Unclassified Delivery |
| 66341 | Short cord complicating labor and delivery, delivered, with or without mention of antepartum condition | Unclassified Delivery |
| 66351 | Vasa previa complicating labor and delivery, delivered, with or without mention of antepartum condition | Unclassified Delivery |
| 66361 | Vascular lesions of cord complicating labor and delivery, delivered, with or without mention of antepartum condition | Unclassified Delivery |
| 66381 | Other umbilical cord complications complicating labor and delivery, delivered, with or without mention of antepartum condition | Unclassified Delivery |
| 66391 | Unspecified umbilical cord complication complicating labor and delivery, delivered, with or without mention of antepartum condition | Unclassified Delivery |
| 66401 | First-degree perineal laceration, delivered, with or without mention of antepartum condition | Unclassified Delivery |
| 66411 | Second-degree perineal laceration, delivered, with or without mention of antepartum condition | Unclassified Delivery |
| 66421 | Third-degree perineal laceration, delivered, with or without mention of antepartum condition | Unclassified Delivery |
| 66431 | Fourth-degree perineal laceration, delivered, with or without mention of antepartum condition | Unclassified Delivery |
| 66441 | Unspecified perineal laceration, delivered, with or without mention of antepartum condition | Unclassified Delivery |
| 66451 | Vulvar and perineal hematoma, delivered, with or without mention of antepartum condition | Unclassified Delivery |
| 66461 | Anal sphincter tear complicating delivery, not associated with third-degree perineal laceration, delivered, with or without mention of antepartum condition | Unclassified Delivery |
| 66481 | Other specified trauma to perineum and vulva, delivered, with or without mention of antepartum condition | Unclassified Delivery |
| 66491 | Unspecified trauma to perineum and vulva, delivered, with or without mention of antepartum condition | Unclassified Delivery |
| 66501 | Rupture of uterus before onset of labor, delivered, with or without mention of antepartum condition | Unclassified Delivery |
| 66511 | Rupture of uterus during labor, delivered, with or without mention of antepartum condition | Unclassified Delivery |
| 66522 | Inversion of uterus, delivered, with mention of postpartum complication | Unclassified Delivery |
| 66531 | Laceration of cervix, delivered, with or without mention of antepartum condition | Unclassified Delivery |
| 66541 | High vaginal laceration, delivered, with or without mention of antepartum condition | Unclassified Delivery |
| 66551 | Other injury to pelvic organs, delivered, with or without mention of antepartum condition | Unclassified Delivery |
| 66561 | Damage to pelvic joints and ligaments, delivered, with or without mention of antepartum condition | Unclassified Delivery |
| 66571 | Pelvic hematoma, delivered, with or without mention of antepartum condition | Unclassified Delivery |
| 66581 | Other specified obstetrical trauma, delivered, with or without mention of antepartum condition | Unclassified Delivery |
| 66591 | Unspecified obstetrical trauma, delivered, with or without mention of antepartum condition | Unclassified Delivery |
| 66602 | Third-stage postpartum hemorrhage, delivered, with mention of postpartum complication | Unclassified Delivery |
| 66612 | Other immediate postpartum hemorrhage, delivered, with mention of postpartum complication | Unclassified Delivery |
| 66622 | Delayed and secondary postpartum hemorrhage, delivered, with mention of postpartum complication | Unclassified Delivery |
| 66632 | Postpartum coagulation defects, delivered, with mention of postpartum complication | Unclassified Delivery |
| 66702 | Retained placenta without hemorrhage, delivered, with mention of postpartum complication | Unclassified Delivery |
| 66712 | Retained portions of placenta or membranes, without hemorrhage, delivered, with mention of postpartum complication | Unclassified Delivery |
| 66801 | Pulmonary complications of anesthesia or other sedation in labor and delivery, delivered, with or without mention of antepartum condition | Unclassified Delivery |
| 66802 | Pulmonary complications of anesthesia or other sedation in labor and delivery, delivered, with mention of postpartum complication | Unclassified Delivery |
| 66811 | Cardiac complications of anesthesia or other sedation in labor and delivery, delivered, with or without mention of antepartum condition | Unclassified Delivery |
| 66812 | Cardiac complications of anesthesia or other sedation in labor and delivery, delivered, with mention of postpartum complication | Unclassified Delivery |
| 66821 | Central nervous system complications of anesthesia or other sedation in labor and delivery, delivered, with or without mention of antepartum condition | Unclassified Delivery |
| 66822 | Central nervous system complications of anesthesia or other sedation in labor and delivery, delivered, with mention of postpartum complication | Unclassified Delivery |
| 66881 | Other complications of anesthesia or other sedation in labor and delivery, delivered, with or without mention of antepartum condition | Unclassified Delivery |
| 66882 | Other complications of anesthesia or other sedation in labor and delivery, delivered, with mention of postpartum complication | Unclassified Delivery |
| 66891 | Unspecified complication of anesthesia and other sedation in labor and delivery, delivered, with or without mention of antepartum condition | Unclassified Delivery |
| 66892 | Unspecified complication of anesthesia and other sedation in labor and delivery, delivered, with mention of postpartum complication | Unclassified Delivery |
| 66901 | Maternal distress complicating labor and delivery, delivered, with or without mention of antepartum condition | Unclassified Delivery |
| 66902 | Maternal distress complicating labor and delivery, delivered, with mention of postpartum complication | Unclassified Delivery |
| 66911 | Shock during or following labor and delivery, delivered, with or without mention of antepartum condition | Unclassified Delivery |
| 66912 | Shock during or following labor and delivery, delivered, with mention of postpartum complication | Unclassified Delivery |
| 66921 | Maternal hypotension syndrome, delivered, with or without mention of antepartum condition | Unclassified Delivery |
| 66922 | Maternal hypotension syndrome, delivered, with mention of postpartum complication | Unclassified Delivery |
| 66932 | Acute kidney failure following labor and delivery, delivered, with mention of postpartum complication | Unclassified Delivery |
| 66941 | Other complications of obstetrical surgery and procedures, delivered, with or without mention of antepartum condition | Unclassified Delivery |
| 66942 | Other complications of obstetrical surgery and procedures, delivered, with mention of postpartum complication | Unclassified Delivery |
| 66951 | Forceps or vacuum extractor delivery without mention of indication, delivered, with or without mention of antepartum condition | Unclassified Delivery |
| 66961 | Breech extraction, without mention of indication, delivered, with or without mention of antepartum condition | Unclassified Delivery |
| 66971 | Cesarean delivery, without mention of indication, delivered, with or without mention of antepartum condition | Unclassified Delivery |
| 66981 | Other complications of labor and delivery, delivered, with or without mention of antepartum condition | Unclassified Delivery |
| 66982 | Other complications of labor and delivery, delivered, with mention of postpartum complication | Unclassified Delivery |
| 66991 | Unspecified complication of labor and delivery, delivered, with or without mention of antepartum condition | Unclassified Delivery |
| 66992 | Unspecified complication of labor and delivery, delivered, with mention of postpartum complication | Unclassified Delivery |
| 67002 | Major puerperal infection, delivered, with mention of postpartum complication | Unclassified Delivery |
| 67012 | Puerperal endometritis, delivered, with mention of postpartum complication | Unclassified Delivery |
| 67022 | Puerperal sepsis, delivered, with mention of postpartum complication | Unclassified Delivery |
| 67032 | Puerperal septic thrombophlebitis, delivered, with mention of postpartum complication | Unclassified Delivery |
| 67082 | Other major puerperal infection, delivered, with mention of postpartum complication | Unclassified Delivery |
| 67101 | Varicose veins of legs complicating pregnancy and the puerperium, delivered, with or without mention of antepartum condition | Unclassified Delivery |
| 67102 | Varicose veins of legs complicating pregnancy and the puerperium, delivered, with mention of postpartum complication | Unclassified Delivery |
| 67111 | Varicose veins of vulva and perineum complicating pregnancy and the puerperium, delivered, with or without mention of antepartum condition | Unclassified Delivery |
| 67112 | Varicose veins of vulva and perineum complicating pregnancy and the puerperium, delivered, with mention of postpartum complication | Unclassified Delivery |
| 67121 | Superficial thrombophlebitis complicating pregnancy and the puerperium, delivered, with or without mention of antepartum condition | Unclassified Delivery |
| 67122 | Superficial thrombophlebitis complicating pregnancy and the puerperium, delivered, with mention of postpartum complication | Unclassified Delivery |
| 67131 | Deep phlebothrombosis, antepartum, delivered, with or without mention of antepartum condition | Unclassified Delivery |
| 67142 | Deep phlebothrombosis, postpartum, delivered, with mention of postpartum complication | Unclassified Delivery |
| 67151 | Other phlebitis and thrombosis complicating pregnancy and the puerperium, delivered, with or without mention of antepartum condition | Unclassified Delivery |
| 67152 | Other phlebitis and thrombosis complicating pregnancy and the puerperium, delivered, with mention of postpartum complication | Unclassified Delivery |
| 67181 | Other venous complications of pregnancy and the puerperium, delivered, with or without mention of antepartum condition | Unclassified Delivery |
| 67182 | Other venous complications of pregnancy and the puerperium, delivered, with mention of postpartum complication | Unclassified Delivery |
| 67191 | Unspecified venous complication of pregnancy and the puerperium, delivered, with or without mention of antepartum condition | Unclassified Delivery |
| 67192 | Unspecified venous complication of pregnancy and the puerperium, delivered, with mention of postpartum complication | Unclassified Delivery |
| 67202 | Pyrexia of unknown origin during the puerperium, delivered, with mention of postpartum complication | Unclassified Delivery |
| 67301 | Obstetrical air embolism, delivered, with or without mention of antepartum condition | Unclassified Delivery |
| 67302 | Obstetrical air embolism, delivered, with mention of postpartum complication | Unclassified Delivery |
| 67311 | Amniotic fluid embolism, delivered, with or without mention of antepartum condition | Unclassified Delivery |
| 67312 | Amniotic fluid embolism, delivered, with mention of postpartum complication | Unclassified Delivery |
| 67321 | Obstetrical blood-clot embolism, delivered, with or without mention of antepartum condition | Unclassified Delivery |
| 67331 | Obstetrical pyemic and septic embolism, delivered, with or without mention of antepartum condition | Unclassified Delivery |
| 67332 | Obstetrical pyemic and septic embolism, delivered, with mention of postpartum complication | Unclassified Delivery |
| 67381 | Other obstetrical pulmonary embolism, delivered, with or without mention of antepartum condition | Unclassified Delivery |
| 67382 | Other obstetrical pulmonary embolism, delivered, with mention of postpartum complication | Unclassified Delivery |
| 67401 | Cerebrovascular disorders in the puerperium, delivered, with or without mention of antepartum condition | Unclassified Delivery |
| 67402 | Cerebrovascular disorders in the puerperium, delivered, with mention of postpartum complication | Unclassified Delivery |
| 67412 | Disruption of cesarean wound, delivered, with mention of postpartum complication | Unclassified Delivery |
| 67422 | Disruption of perineal wound, delivered, with mention of postpartum complication | Unclassified Delivery |
| 67432 | Other complications of obstetrical surgical wounds, delivered, with mention of postpartum complication | Unclassified Delivery |
| 67442 | Placental polyp, delivered, with mention of postpartum complication | Unclassified Delivery |
| 67451 | Peripartum cardiomyopathy, delivered, with or without mention of antepartum condition | Unclassified Delivery |
| 67452 | Peripartum cardiomyopathy, delivered, with mention of postpartum condition | Unclassified Delivery |
| 67482 | Other complications of puerperium, delivered, with mention of postpartum complication | Unclassified Delivery |
| 67492 | Unspecified complications of puerperium, delivered, with mention of postpartum complication | Unclassified Delivery |
| 67501 | Infections of nipple associated with childbirth, delivered, with or without mention of antepartum condition | Unclassified Delivery |
| 67502 | Infections of nipple associated with childbirth, delivered, with mention of postpartum complication | Unclassified Delivery |
| 67511 | Abscess of breast associated with childbirth, delivered, with or without mention of antepartum condition | Unclassified Delivery |
| 67512 | Abscess of breast associated with childbirth, delivered, with mention of postpartum complication | Unclassified Delivery |
| 67521 | Nonpurulent mastitis associated with childbirth, delivered, with or without mention of antepartum condition | Unclassified Delivery |
| 67522 | Nonpurulent mastitis associated with childbirth, delivered, with mention of postpartum complication | Unclassified Delivery |
| 67581 | Other specified infections of the breast and nipple associated with childbirth, delivered, with or without mention of antepartum condition | Unclassified Delivery |
| 67582 | Other specified infections of the breast and nipple associated with childbirth, delivered, with mention of postpartum complication | Unclassified Delivery |
| 67591 | Unspecified infection of the breast and nipple associated with childbirth, delivered, with or without mention of antepartum condition | Unclassified Delivery |
| 67592 | Unspecified infection of the breast and nipple associated with childbirth, delivered, with mention of postpartum complication | Unclassified Delivery |
| 67601 | Retracted nipple associated with childbirth, delivered, with or without mention of antepartum condition | Unclassified Delivery |
| 67602 | Retracted nipple associated with childbirth, delivered, with mention of postpartum complication | Unclassified Delivery |
| 67611 | Cracked nipple associated with childbirth, delivered, with or without mention of antepartum condition | Unclassified Delivery |
| 67612 | Cracked nipple associated with childbirth, delivered, with mention of postpartum complication | Unclassified Delivery |
| 67621 | Engorgement of breasts associated with childbirth, delivered, with or without mention of antepartum condition | Unclassified Delivery |
| 67622 | Engorgement of breasts associated with childbirth, delivered, with mention of postpartum complication | Unclassified Delivery |
| 67631 | Other and unspecified disorder of breast associated with childbirth, delivered, with or without mention of antepartum condition | Unclassified Delivery |
| 67632 | Other and unspecified disorder of breast associated with childbirth, delivered, with mention of postpartum complication | Unclassified Delivery |
| 67641 | Failure of lactation, delivered, with or without mention of antepartum condition | Unclassified Delivery |
| 67642 | Failure of lactation, delivered, with mention of postpartum complication | Unclassified Delivery |
| 67651 | Suppressed lactation, delivered, with or without mention of antepartum condition | Unclassified Delivery |
| 67652 | Suppressed lactation, delivered, with mention of postpartum complication | Unclassified Delivery |
| 67661 | Galactorrhea associated with childbirth, delivered, with or without mention of antepartum condition | Unclassified Delivery |
| 67662 | Galactorrhea associated with childbirth, delivered, with mention of postpartum complication | Unclassified Delivery |
| 67681 | Other disorders of lactation, delivered, with or without mention of antepartum condition | Unclassified Delivery |
| 67682 | Other disorders of lactation, delivered, with mention of postpartum complication | Unclassified Delivery |
| 67691 | Unspecified disorder of lactation, delivered, with or without mention of antepartum condition | Unclassified Delivery |
| 67692 | Unspecified disorder of lactation, delivered, with mention of postpartum complication | Unclassified Delivery |
| 67801 | Fetal hematologic conditions, delivered, with or without mention of antepartum condition | Unclassified Delivery |
| 67811 | Fetal conjoined twins, delivered, with or without mention of antepartum condition | Unclassified Delivery |
| 67901 | Maternal complications from in utero procedure, delivered, with or without mention of antepartum condition | Unclassified Delivery |
| 67902 | Maternal complications from in utero procedure, delivered, with mention of postpartum complication | Unclassified Delivery |
| 67911 | Fetal complications from in utero procedure, delivered, with or without mention of antepartum condition | Unclassified Delivery |
| 67912 | Fetal complications from in utero procedure, delivered, with mention of postpartum complication | Unclassified Delivery |

NOTES:

1. The table includes an adaptation of ICD-9-CM codes and descriptions which are publicly available for download at the following location: <ftp://ftp.cdc.gov/pub/Health_Statistics/NCHS/Publications/ICD9-CM/2011>
2. The decimal points in the codes are removed. Some codes that have a trailing “x” imply all ICD-9-CM codes with similar initial digits were included in the algorithm and description of the code may vary for subclasses of the code.

eTable 2- Diagnosis codes for live/mixed birth and delivery (ICD-10-CM)

| ICD-10-CM Code | Code Description | Category |
| --- | --- | --- |
| Z388 | Other multiple liveborn infant, unspecified as to place of birth | live birth |
| Z387 | Other multiple liveborn infant, born outside hospital | live birth |
| Z3869 | Other multiple liveborn infant, delivered by cesarean | live birth |
| Z3868 | Other multiple liveborn infant, delivered vaginally | live birth |
| Z3866 | Quintuplet liveborn infant, delivered by cesarean | live birth |
| Z3865 | Quintuplet liveborn infant, delivered vaginally | live birth |
| Z3864 | Quadruplet liveborn infant, delivered by cesarean | live birth |
| Z3863 | Quadruplet liveborn infant, delivered vaginally | live birth |
| Z3862 | Triplet liveborn infant, delivered by cesarean | live birth |
| Z3861 | Triplet liveborn infant, delivered vaginally | live birth |
| Z384 | Twin liveborn infant, born outside hospital | live birth |
| Z385 | Twin liveborn infant, unspecified as to place of birth | live birth |
| Z3831 | Twin liveborn infant, delivered by cesarean | live birth |
| Z3830 | Twin liveborn infant, delivered vaginally | live birth |
| Z382 | Single liveborn infant, unspecified as to place of birth | live birth |
| Z381 | Single liveborn infant, born outside hospital | live birth |
| Z3801 | Single liveborn infant, delivered by cesarean | live birth |
| Z3800 | Single liveborn infant, delivered vaginally | live birth |
| Z3759 | Other multiple births, all liveborn | live birth |
| Z3754 | Sextuplets, all liveborn | live birth |
| Z3753 | Quintuplets, all liveborn | live birth |
| Z3752 | Quadruplets, all liveborn | live birth |
| Z3751 | Triplets, all liveborn | live birth |
| Z3750 | Multiple births, unspecified, all liveborn | live birth |
| Z372 | Twins, both liveborn | live birth |
| Z370 | Single live birth | live birth |
| O6023X9 | Term delivery with preterm labor, third trimester, other fetus | live birth |
| O6023X5 | Term delivery with preterm labor, third trimester, fetus 5 | live birth |
| O6023X4 | Term delivery with preterm labor, third trimester, fetus 4 | live birth |
| O6023X3 | Term delivery with preterm labor, third trimester, fetus 3 | live birth |
| O6023X2 | Term delivery with preterm labor, third trimester, fetus 2 | live birth |
| O6023X1 | Term delivery with preterm labor, third trimester, fetus 1 | live birth |
| O6023X0 | Term delivery with preterm labor, third trimester, not applicable or unspecified | live birth |
| O6022X9 | Term delivery with preterm labor, second trimester, other fetus | live birth |
| O6022X5 | Term delivery with preterm labor, second trimester, fetus 5 | live birth |
| O6022X4 | Term delivery with preterm labor, second trimester, fetus 4 | live birth |
| O6022X3 | Term delivery with preterm labor, second trimester, fetus 3 | live birth |
| O6022X2 | Term delivery with preterm labor, second trimester, fetus 2 | live birth |
| O6022X1 | Term delivery with preterm labor, second trimester, fetus 1 | live birth |
| O6022X0 | Term delivery with preterm labor, second trimester, not applicable or unspecified | live birth |
| O7582 | Onset (spontaneous) of labor after 37 completed weeks of gestation but before 39 completed weeks gestation, with delivery by (planned) cesarean section | live birth |
| Z3769 | Other multiple births, some liveborn | mixed delivery |
| Z3764 | Sextuplets, some liveborn | mixed delivery |
| Z3763 | Quintuplets, some liveborn | mixed delivery |
| Z3762 | Quadruplets, some liveborn | mixed delivery |
| Z3761 | Triplets, some liveborn | mixed delivery |
| Z3760 | Multiple births, unspecified, some liveborn | mixed delivery |
| Z373 | Twins, one liveborn and one stillborn | mixed delivery |
| O82 | Encounter for cesarean delivery without indication | Unclassified delivery |
| O99844 | Bariatric surgery status complicating childbirth | Unclassified delivery |
| O99354 | Diseases of the nervous system complicating childbirth | Unclassified Delivery |
| O99334 | Smoking (tobacco) complicating childbirth | Unclassified delivery |
| O99214 | Obesity complicating childbirth | Unclassified delivery |
| O9912 | Other diseases of the blood and blood-forming organs and certain disorders involving the immune mechanism complicating childbirth | Unclassified delivery |
| O779 | Labor and delivery complicated by fetal stress, unspecified | Unclassified delivery |
| O778 | Labor and delivery complicated by other evidence of fetal stress | Unclassified delivery |
| O80 | Encounter for full-term uncomplicated delivery | Unclassified delivery |
| O709 | Perineal laceration during delivery, unspecified | Unclassified delivery |
| O703 | Fourth degree perineal laceration during delivery | Unclassified delivery |
| O7023 | Third degree perineal laceration during delivery, IIIc | Unclassified delivery |
| O7022 | Third degree perineal laceration during delivery, IIIb | Unclassified delivery |
| O7021 | Third degree perineal laceration during delivery, IIIa | Unclassified delivery |
| O7020 | Third degree perineal laceration during delivery, unspecified | Unclassified delivery |
| O701 | Second degree perineal laceration during delivery | Unclassified delivery |
| O700 | First degree perineal laceration during delivery | Unclassified delivery |
| O770 | Labor and delivery complicated by meconium in amniotic fluid | Unclassified Delivery |
| O76 | Abnormality in fetal heart rate and rhythm complicating labor and delivery | Unclassified delivery |
| O759 | Complication of labor and delivery, unspecified | Unclassified delivery |
| O7589 | Other specified complications of labor and delivery | Unclassified delivery |
| O7581 | Maternal exhaustion complicating labor and delivery | Unclassified delivery |
| O755 | Delayed delivery after artificial rupture of membranes | Unclassified delivery |
| O749 | Complication of anesthesia during labor and delivery, unspecified | Unclassified delivery |
| O748 | Other complications of anesthesia during labor and delivery | Unclassified delivery |
| O747 | Failed or difficult intubation for anesthesia during labor and delivery | Unclassified delivery |
| O746 | Other complications of spinal and epidural anesthesia during labor and delivery | Unclassified delivery |
| O745 | Spinal and epidural anesthesia-induced headache during labor and delivery | Unclassified delivery |
| O744 | Toxic reaction to local anesthesia during labor and delivery | Unclassified delivery |
| O743 | Central nervous system complications of anesthesia during labor and delivery | Unclassified delivery |
| O742 | Cardiac complications of anesthesia during labor and delivery | Unclassified delivery |
| O741 | Other pulmonary complications of anesthesia during labor and delivery | Unclassified delivery |
| O740 | Aspiration pneumonitis due to anesthesia during labor and delivery | Unclassified delivery |
| O704 | Anal sphincter tear complicating delivery, not associated with third degree laceration | Unclassified delivery |
| O699XX9 | Labor and delivery complicated by cord complication, unspecified, other fetus | Unclassified delivery |
| O699XX5 | Labor and delivery complicated by cord complication, unspecified, fetus 5 | Unclassified delivery |
| O699XX4 | Labor and delivery complicated by cord complication, unspecified, fetus 4 | Unclassified delivery |
| O699XX3 | Labor and delivery complicated by cord complication, unspecified, fetus 3 | Unclassified delivery |
| O699XX2 | Labor and delivery complicated by cord complication, unspecified, fetus 2 | Unclassified delivery |
| O699XX1 | Labor and delivery complicated by cord complication, unspecified, fetus 1 | Unclassified delivery |
| O699XX0 | Labor and delivery complicated by cord complication, unspecified, not applicable or unspecified | Unclassified delivery |
| O6989X9 | Labor and delivery complicated by other cord complications, other fetus | Unclassified delivery |
| Z379 | Outcome of delivery, unspecified | Unclassified delivery |
| O9A52 | Psychological abuse complicating childbirth | Unclassified delivery |
| O9A42 | Sexual abuse complicating childbirth | Unclassified delivery |
| O9A32 | Physical abuse complicating childbirth | Unclassified delivery |
| O9A22 | Injury, poisoning and certain other consequences of external causes complicating childbirth | Unclassified delivery |
| O9A12 | Malignant neoplasm complicating childbirth | Unclassified delivery |
| O6989X5 | Labor and delivery complicated by other cord complications, fetus 5 | Unclassified delivery |
| O99834 | Other infection carrier state complicating childbirth | Unclassified delivery |
| O99824 | Streptococcus B carrier state complicating childbirth | Unclassified delivery |
| O99814 | Abnormal glucose complicating childbirth | Unclassified delivery |
| O9972 | Diseases of the skin and subcutaneous tissue complicating childbirth | Unclassified delivery |
| O9962 | Diseases of the digestive system complicating childbirth | Unclassified delivery |
| O9952 | Diseases of the respiratory system complicating childbirth | Unclassified delivery |
| O9942 | Diseases of the circulatory system complicating childbirth | Unclassified delivery |
| O6989X4 | Labor and delivery complicated by other cord complications, fetus 4 | Unclassified delivery |
| O99344 | Other mental disorders complicating childbirth | Unclassified delivery |
| O6989X3 | Labor and delivery complicated by other cord complications, fetus 3 | Unclassified delivery |
| O99324 | Drug use complicating childbirth | Unclassified delivery |
| O99314 | Alcohol use complicating childbirth | Unclassified delivery |
| O99284 | Endocrine, nutritional and metabolic diseases complicating childbirth | Unclassified delivery |
| O6989X2 | Labor and delivery complicated by other cord complications, fetus 2 | Unclassified delivery |
| O6989X1 | Labor and delivery complicated by other cord complications, fetus 1 | Unclassified delivery |
| O9892 | Unspecified maternal infectious and parasitic disease complicating childbirth | Unclassified delivery |
| O9882 | Other maternal infectious and parasitic diseases complicating childbirth | Unclassified delivery |
| O9872 | Human immunodeficiency virus [HIV] disease complicating childbirth | Unclassified delivery |
| O9862 | Protozoal diseases complicating childbirth | Unclassified delivery |
| O9852 | Other viral diseases complicating childbirth | Unclassified delivery |
| O9842 | Viral hepatitis complicating childbirth | Unclassified delivery |
| O9822 | Gonorrhea complicating childbirth | Unclassified delivery |
| O9812 | Syphilis complicating childbirth | Unclassified delivery |
| O9802 | Tuberculosis complicating childbirth | Unclassified delivery |
| O6989X0 | Labor and delivery complicated by other cord complications, not applicable or unspecified | Unclassified delivery |
| O6982X9 | Labor and delivery complicated by other cord entanglement, without compression, other fetus | Unclassified delivery |
| O6982X5 | Labor and delivery complicated by other cord entanglement, without compression, fetus 5 | Unclassified delivery |
| O6982X4 | Labor and delivery complicated by other cord entanglement, without compression, fetus 4 | Unclassified delivery |
| O6982X3 | Labor and delivery complicated by other cord entanglement, without compression, fetus 3 | Unclassified delivery |
| O6982X2 | Labor and delivery complicated by other cord entanglement, without compression, fetus 2 | Unclassified delivery |
| O6982X1 | Labor and delivery complicated by other cord entanglement, without compression, fetus 1 | Unclassified delivery |
| O6982X0 | Labor and delivery complicated by other cord entanglement, without compression, not applicable or unspecified | Unclassified delivery |
| O6981X9 | Labor and delivery complicated by cord around neck, without compression, other fetus | Unclassified delivery |
| O6981X5 | Labor and delivery complicated by cord around neck, without compression, fetus 5 | Unclassified delivery |
| O6981X4 | Labor and delivery complicated by cord around neck, without compression, fetus 4 | Unclassified delivery |
| O6981X3 | Labor and delivery complicated by cord around neck, without compression, fetus 3 | Unclassified delivery |
| O6981X2 | Labor and delivery complicated by cord around neck, without compression, fetus 2 | Unclassified delivery |
| O6981X1 | Labor and delivery complicated by cord around neck, without compression, fetus 1 | Unclassified delivery |
| O6981X0 | Labor and delivery complicated by cord around neck, without compression, not applicable or unspecified | Unclassified delivery |
| O695XX9 | Labor and delivery complicated by vascular lesion of cord, other fetus | Unclassified delivery |
| O695XX5 | Labor and delivery complicated by vascular lesion of cord, fetus 5 | Unclassified delivery |
| O695XX4 | Labor and delivery complicated by vascular lesion of cord, fetus 4 | Unclassified delivery |
| O8882 | Other embolism in childbirth | Unclassified delivery |
| O8832 | Pyemic and septic embolism in childbirth | Unclassified delivery |
| O8822 | Thromboembolism in childbirth | Unclassified delivery |
| O8812 | Amniotic fluid embolism in childbirth | Unclassified delivery |
| O8802 | Air embolism in childbirth | Unclassified delivery |
| O695XX3 | Labor and delivery complicated by vascular lesion of cord, fetus 3 | Unclassified delivery |
| O695XX2 | Labor and delivery complicated by vascular lesion of cord, fetus 2 | Unclassified delivery |
| O695XX1 | Labor and delivery complicated by vascular lesion of cord, fetus 1 | Unclassified delivery |
| O695XX0 | Labor and delivery complicated by vascular lesion of cord, not applicable or unspecified | Unclassified delivery |
| O694XX9 | Labor and delivery complicated by vasa previa, other fetus | Unclassified delivery |
| O694XX5 | Labor and delivery complicated by vasa previa, fetus 5 | Unclassified delivery |
| O694XX4 | Labor and delivery complicated by vasa previa, fetus 4 | Unclassified delivery |
| O694XX3 | Labor and delivery complicated by vasa previa, fetus 3 | Unclassified delivery |
| O694XX2 | Labor and delivery complicated by vasa previa, fetus 2 | Unclassified delivery |
| O694XX1 | Labor and delivery complicated by vasa previa, fetus 1 | Unclassified delivery |
| O694XX0 | Labor and delivery complicated by vasa previa, not applicable or unspecified | Unclassified delivery |
| O693XX9 | Labor and delivery complicated by short cord, other fetus | Unclassified delivery |
| O693XX5 | Labor and delivery complicated by short cord, fetus 5 | Unclassified delivery |
| O693XX4 | Labor and delivery complicated by short cord, fetus 4 | Unclassified delivery |
| O693XX3 | Labor and delivery complicated by short cord, fetus 3 | Unclassified delivery |
| O693XX2 | Labor and delivery complicated by short cord, fetus 2 | Unclassified delivery |
| O693XX1 | Labor and delivery complicated by short cord, fetus 1 | Unclassified delivery |
| O693XX0 | Labor and delivery complicated by short cord, not applicable or unspecified | Unclassified delivery |
| O692XX9 | Labor and delivery complicated by other cord entanglement, with compression, other fetus | Unclassified delivery |
| O692XX5 | Labor and delivery complicated by other cord entanglement, with compression, fetus 5 | Unclassified delivery |
| O692XX4 | Labor and delivery complicated by other cord entanglement, with compression, fetus 4 | Unclassified delivery |
| O692XX3 | Labor and delivery complicated by other cord entanglement, with compression, fetus 3 | Unclassified delivery |
| O692XX2 | Labor and delivery complicated by other cord entanglement, with compression, fetus 2 | Unclassified delivery |
| O692XX1 | Labor and delivery complicated by other cord entanglement, with compression, fetus 1 | Unclassified delivery |
| O751 | Shock during or following labor and delivery | Unclassified delivery |
| O750 | Maternal distress during labor and delivery | Unclassified delivery |
| O692XX0 | Labor and delivery complicated by other cord entanglement, with compression, not applicable or unspecified | Unclassified delivery |
| O691XX9 | Labor and delivery complicated by cord around neck, with compression, other fetus | Unclassified delivery |
| O691XX5 | Labor and delivery complicated by cord around neck, with compression, fetus 5 | Unclassified delivery |
| O691XX4 | Labor and delivery complicated by cord around neck, with compression, fetus 4 | Unclassified delivery |
| O691XX3 | Labor and delivery complicated by cord around neck, with compression, fetus 3 | Unclassified delivery |
| O691XX2 | Labor and delivery complicated by cord around neck, with compression, fetus 2 | Unclassified delivery |
| O691XX1 | Labor and delivery complicated by cord around neck, with compression, fetus 1 | Unclassified delivery |
| O691XX0 | Labor and delivery complicated by cord around neck, with compression, not applicable or unspecified | Unclassified delivery |
| O690XX9 | Labor and delivery complicated by prolapse of cord, other fetus | Unclassified delivery |
| O690XX5 | Labor and delivery complicated by prolapse of cord, fetus 5 | Unclassified delivery |
| O690XX4 | Labor and delivery complicated by prolapse of cord, fetus 4 | Unclassified delivery |
| O690XX3 | Labor and delivery complicated by prolapse of cord, fetus 3 | Unclassified delivery |
| O690XX2 | Labor and delivery complicated by prolapse of cord, fetus 2 | Unclassified delivery |
| O690XX1 | Labor and delivery complicated by prolapse of cord, fetus 1 | Unclassified delivery |
| O690XX0 | Labor and delivery complicated by prolapse of cord, not applicable or unspecified | Unclassified delivery |
| O68 | Labor and delivery complicated by abnormality of fetal acid-base balance | Unclassified delivery |
| O632 | Delayed delivery of second twin, triplet, etc | Unclassified delivery |
| O2662 | Liver and biliary tract disorders in childbirth | Unclassified delivery |
| O679 | Intrapartum hemorrhage, unspecified | Unclassified delivery |
| O678 | Other intrapartum hemorrhage | Unclassified delivery |
| O670 | Intrapartum hemorrhage with coagulation defect | Unclassified delivery |
| O2672 | Subluxation of symphysis (pubis) in childbirth | Unclassified delivery |
| O252 | Malnutrition in childbirth | Unclassified delivery |
| O2492 | Unspecified diabetes mellitus in childbirth | Unclassified delivery |
| O2482 | Other pre-existing diabetes mellitus in childbirth | Unclassified delivery |
| O24429 | Gestational diabetes mellitus in childbirth, unspecified control | Unclassified delivery |
| O24425 | Gestational diabetes mellitus in childbirth, controlled by oral hypoglycemic drugs | Unclassified delivery |
| O24424 | Gestational diabetes mellitus in childbirth, insulin controlled | Unclassified delivery |
| O24420 | Gestational diabetes mellitus in childbirth, diet controlled | Unclassified delivery |
| O2432 | Unspecified pre-existing diabetes mellitus in childbirth | Unclassified delivery |
| O2412 | Pre-existing type 2 diabetes mellitus, in childbirth | Unclassified delivery |
| O2402 | Pre-existing type 1 diabetes mellitus, in childbirth | Unclassified delivery |
| O164 | Unspecified maternal hypertension, complicating childbirth | Unclassified delivery |
| O1494 | Unspecified pre-eclampsia, complicating childbirth | Unclassified delivery |
| O1424 | HELLP syndrome, complicating childbirth | Unclassified delivery |
| O1414 | Severe pre-eclampsia complicating childbirth | Unclassified delivery |
| O1404 | Mild to moderate pre-eclampsia, complicating childbirth | Unclassified delivery |
| O134 | Gestational [pregnancy-induced] hypertension without significant proteinuria, complicating childbirth | Unclassified delivery |
| O1224 | Gestational edema with proteinuria, complicating childbirth | Unclassified delivery |
| O1214 | Gestational proteinuria, complicating childbirth | Unclassified delivery |
| O1204 | Gestational edema, complicating childbirth | Unclassified delivery |
| O114 | Pre-existing hypertension with pre-eclampsia, complicating childbirth | Unclassified delivery |
| O1092 | Unspecified pre-existing hypertension complicating childbirth | Unclassified delivery |
| O1042 | Pre-existing secondary hypertension complicating childbirth | Unclassified delivery |
| O1032 | Pre-existing hypertensive heart and chronic kidney disease complicating childbirth | Unclassified delivery |
| O1022 | Pre-existing hypertensive chronic kidney disease complicating childbirth | Unclassified delivery |
| O1012 | Pre-existing hypertensive heart disease complicating childbirth | Unclassified delivery |
| O1002 | Pre-existing essential hypertension complicating childbirth | Unclassified delivery |
| O665 | Attempted application of vacuum or forceps, with subsequent delivery by forceps or cesarean delivery | Unclassified delivery |
| O771 | Fetal stress in labor or delivery due to drug administration | Unclassified delivery |
| O4292 | Full-term premature rupture of membranes, unspecified as to length of time between rupture and onset of labor | Unclassified delivery |
| O4212 | Full-term premature rupture of membranes, onset of labor more than 24 hours following rupture | Unclassified delivery |
| O4202 | Full-term premature rupture of membranes, onset of labor within 24 hours of rupture | Unclassified delivery |

NOTES:

1. The table includes an adaptation of ICD-10-CM codes and descriptions which are publicly available for download at the following location: <ftp://ftp.cdc.gov/pub/Health_Statistics/NCHS/Publications/ICD10CM/2021/>
2. The decimal points in the codes are removed.

eTable 3- Procedure codes for delivery (ICD-9-CM)

| Code | Code Description | Category |
| --- | --- | --- |
| 720x | Low Forceps Operation | Unclassified Delivery |
| 721x | Low Forceps Operation With Episiotomy | Unclassified Delivery |
| 722x | Mid Forceps Operation | Unclassified Delivery |
| 723x | High Forceps Operation | Unclassified Delivery |
| 724x | Forceps Rotation Of Fetal Head | Unclassified Delivery |
| 725x | Breech Extraction | Unclassified Delivery |
| 726x | Forceps Application To Aftercoming Head | Unclassified Delivery |
| 727x | Vacuum Extraction | Unclassified Delivery |
| 728x | Other Specified Instrumental Delivery | Unclassified Delivery |
| 729x | Unspecified Instrumental Delivery | Unclassified Delivery |
| 730x | Artificial Rupture Of Membranes | Unclassified Delivery |
| 731x | Other Surgical Induction Of Labor | Unclassified Delivery |
| 732x | Internal And Combined Version And Extraction | Unclassified Delivery |
| 733x | Failed Forceps | Unclassified Delivery |
| 734x | Medical Induction Of Labor | Unclassified Delivery |
| 735x | Manually Assisted Delivery | Unclassified Delivery |
| 736x | Episiotomy | Unclassified Delivery |
| 738x | Operations On Fetus To Facilitate Delivery | Unclassified Delivery |
| 739x | Other Operations Assisting Delivery | Unclassified Delivery |
| 740x | Classical Cesarean Section | Unclassified Delivery |
| 741x | Low Cervical Cesarean Section | Unclassified Delivery |
| 742x | Extraperitoneal Cesarean Section | Unclassified Delivery |
| 744x | Cesarean Section Of Other Specified Type | Unclassified Delivery |
| 749x | Cesarean Section Of Unspecified Type | Unclassified Delivery |
| 754x | Manual removal of retained placenta | Unclassified Delivery |

NOTES:

1. The table includes an adaptation of ICD-9-CM codes and descriptions which are publicly available for download at the following location: <ftp://ftp.cdc.gov/pub/Health_Statistics/NCHS/Publications/ICD9-CM/2011>
2. The decimal points in the codes are removed. Codes that have a trailing “x” imply all ICD-9-CM codes with similar initial digits were included in the algorithm and description of the code may vary for subclasses of the code.

eTable 4- Procedure codes for delivery (ICD-10-PCS)

| ICD-10-PCS Code | Code Description | Comment |
| --- | --- | --- |
| 0W8NXZZ | Division of Female Perineum, External Approach | Unclassified delivery |
| 10900ZC | Drainage of Amniotic Fluid, Therapeutic from Products of Conception, Open Approach | Unclassified delivery |
| 10903ZC | Drainage of Amniotic Fluid, Therapeutic from Products of Conception, Percutaneous Approach | Unclassified delivery |
| 10904ZC | Drainage of Amniotic Fluid, Therapeutic from Products of Conception, Percutaneous Endoscopic Approach | Unclassified delivery |
| 10907ZC | Drainage of Amniotic Fluid, Therapeutic from Products of Conception, Via Natural or Artificial Opening | Unclassified delivery |
| 10908ZC | Drainage of Amniotic Fluid, Therapeutic from Products of Conception, Via Natural or Artificial Opening Endoscopic | Unclassified delivery |
| 10D00Z0 | Extraction of Products of Conception, Classical, Open Approach | Unclassified delivery |
| 10D00Z1 | Extraction of Products of Conception, Low Cervical, Open Approach | Unclassified delivery |
| 10D00Z2 | Extraction of Products of Conception, Extraperitoneal, Open Approach | Unclassified delivery |
| 10D07Z3 | Extraction of Products of Conception, Low Forceps, Via Natural or Artificial Opening | Unclassified delivery |
| 10D07Z4 | Extraction of Products of Conception, Mid Forceps, Via Natural or Artificial Opening | Unclassified delivery |
| 10D07Z5 | Extraction of Products of Conception, High Forceps, Via Natural or Artificial Opening | Unclassified delivery |
| 10D07Z6 | Extraction of Products of Conception, Vacuum, Via Natural or Artificial Opening | Unclassified delivery |
| 10D07Z7 | Extraction of Products of Conception, Internal Version, Via Natural or Artificial Opening | Unclassified delivery |
| 10D07Z8 | Extraction of Products of Conception, Other, Via Natural or Artificial Opening | Unclassified delivery |
| 10S07ZZ | Reposition Products of Conception, Via Natural or Artificial Opening | Unclassified delivery |
| 10E0XZZ | Delivery of Products of Conception, External Approach | Unclassified delivery |
| 10D17Z9 | Manual Extraction of Products of Conception, Retained, Via Natural or Artificial Opening | Unclassified delivery |
| 10D18Z9 | Manual Extraction of Products of Conception, Retained, Via Natural or Artificial Opening Endoscopic | Unclassified delivery |

NOTES:

1. The table includes an adaptation of ICD-9-CM codes and descriptions which are publicly available for download at the following location: <https://www.cms.gov/Medicare/Coding/ICD10/2018-ICD-10-PCS-and-GEMs>
2. The decimal points in the codes are removed.

eTable 5- Procedure codes for delivery (CPT)

| ICD-10 Code | Code Description | Comment |
| --- | --- | --- |
| 99440 | Newborn resuscitation: provision of positive pressure ventilation and/or chest compressions in the presence of acute inadequate ventilation and/or cardiac output | Live birth |
| 99465 | Newborn resuscitation: provision of positive pressure ventilation and/or chest compressions in the presence of acute inadequate ventilation and/or cardiac output | Live birth |
| 01960 | Anesthesia for vaginal delivery only | Unclassified Delivery |
| 01961 | Anesthesia for cesarean delivery only | Unclassified Delivery |
| 01963 | Anesthesia for cesarean hysterectomy without any labor analgesia/anesthesia care | Unclassified Delivery |
| 01967 | Neuraxial labor analgesia/anesthesia for planned vaginal delivery (this includes any repeat subarachnoid needle placement and drug injection and/or any necessary replacement of an epidural catheter during labor) | Unclassified Delivery |
| 01968 | Anesthesia for cesarean delivery following neuraxial labor analgesia/anesthesia (List separately in addition to code for primary procedure performed) | Unclassified Delivery |
| 01969 | Anesthesia for cesarean hysterectomy following neuraxial labor analgesia/anesthesia (List separately in addition to code for primary procedure performed) | Unclassified Delivery |
| 58611 | Ligation or transection of fallopian tube(s) when done at the time of cesarean delivery or intra-abdominal surgery (not a separate procedure) (List separately in addition to code for primary procedure) | Unclassified Delivery |
| 59300 | Episiotomy or vaginal repair, by other than attending | Unclassified Delivery |
| 59400 | Routine obstetric care including antepartum care, vaginal delivery (with or without episiotomy, and/or forceps) and postpartum care | Unclassified Delivery |
| 59409 | Vaginal delivery only (with or without episiotomy and/or forceps) | Unclassified Delivery |
| 59414 | Delivery of placenta (separate procedure) | Unclassified Delivery |
| 59510 | Routine obstetric care including antepartum care, cesarean delivery, and postpartum care | Unclassified Delivery |
| 59514 | Cesarean delivery only | Unclassified Delivery |
| 59525 | Subtotal or total hysterectomy after cesarean delivery (List separately in addition to code for primary procedure) | Unclassified Delivery |
| 59610 | Routine obstetric care including antepartum care, vaginal delivery (with or without episiotomy, and/or forceps) and postpartum care, after previous cesarean delivery | Unclassified Delivery |
| 59612 | Vaginal delivery only, after previous cesarean delivery (with or without episiotomy and/or forceps) | Unclassified Delivery |
| 59614 | Vaginal delivery only, after previous cesarean delivery (with or without episiotomy and/or forceps); including postpartum care | Unclassified Delivery |
| 59618 | Routine obstetric care including antepartum care, cesarean delivery, and postpartum care, following attempted vaginal delivery after previous cesarean delivery | Unclassified Delivery |
| 59620 | Cesarean delivery only, following attempted vaginal delivery after previous cesarean delivery | Unclassified Delivery |
| 59622 | Cesarean delivery only, following attempted vaginal delivery after previous cesarean delivery; including postpartum care | Unclassified Delivery |
| 99436 | Attendance at delivery (when requested by delivering physician) and initial stabilization of newborn | Unclassified Delivery |
| 99464 | Attendance at delivery (when requested by delivering physician) and initial stabilization of newborn | Unclassified Delivery |
| 01962 | Anesthesia for urgent hysterectomy following delivery | Unclassified Delivery |

eTable 6- Stillbirth (ICD, CPT, HPCS)

| Code type | Code | Code Description |
| --- | --- | --- |
| CPT | 88016 | Necropsy (autopsy), gross examination only; macerated stillborn |
| HCPCS | S2265 | Induced abortion, 25 to 28 weeks |
| HCPCS | S2266 | Induced abortion, 29 to 31 weeks |
| HCPCS | S2267 | Induced abortion, 32 weeks or greater |
| ICD-9-CM | V271x | Mother with single stillborn |
| ICD-9-CM | V274x | Mother with twins both stillborn |
| ICD-9-CM | V277x | Mother with other multiple birth all stillborn |
| ICD-9-CM | 65640 | Intrauterine death affecting management of mother unspecified as to episode of care |
| ICD-9-CM | 65641 | Intrauterine death affecting management of mother delivered |
| ICD-9-CM | 65643 | Intrauterine death affecting management of mother antepartum |
| ICD-10-CM | O364XX0 | Maternal care for intrauterine death, not applicable or unspecified |
| ICD-10-CM | O364XX1 | Maternal care for intrauterine death, fetus 1 |
| ICD-10-CM | O364XX2 | Maternal care for intrauterine death, fetus 2 |
| ICD-10-CM | O364XX3 | Maternal care for intrauterine death, fetus 3 |
| ICD-10-CM | O364XX4 | Maternal care for intrauterine death, fetus 4 |
| ICD-10-CM | O364XX5 | Maternal care for intrauterine death, fetus 5 |
| ICD-10-CM | O364XX9 | Maternal care for intrauterine death, other fetus |
| ICD-10-CM | Z371 | Single stillbirth |
| ICD-10-CM | Z374 | Twins, both stillborn |
| ICD-10-CM | Z377 | Other multiple births, all stillborn |

NOTES:

1. The table includes an adaptation of ICD-9-CM/ICD-10-CM codes and descriptions which are publicly available for download at the following location: <ftp://ftp.cdc.gov/pub/Health_Statistics/NCHS/Publications/ICD9-CM/2011>

<ftp://ftp.cdc.gov/pub/Health_Statistics/NCHS/Publications/ICD10CM/2021/>

1. The decimal points in the codes are removed. Codes that have a trailing “x” imply all ICD-9-CM codes with similar initial digits were included in the algorithm and description of the code may vary for subclasses of the code.

eTable 7- Induced abortion (ICD, CPT, HCPCS)

| Code type | Code | Code Description |
| --- | --- | --- |
| CPT | 01966 | Anesthesia for induced abortion procedures |
| CPT | 59840 | Induced abortion, by dilation and curettage |
| CPT | 59841 | Induced abortion, by dilation and evacuation |
| CPT | 59850 | Induced abortion, by 1 or more intra-amniotic injections (amniocentesis-injections), including hospital admission and visits, delivery of fetus and secundines |
| CPT | 59851 | Induced abortion, by 1 or more intra-amniotic injections (amniocentesis-injections), including hospital admission and visits, delivery of fetus and secundines; with dilation and curettage and/or evacuation |
| CPT | 59852 | Induced abortion, by 1 or more intra-amniotic injections (amniocentesis-injections), including hospital admission and visits, delivery of fetus and secundines; with hysterotomy (failed intra-amniotic injection) |
| CPT | 59855 | Induced abortion, by 1 or more vaginal suppositories (eg, prostaglandin) with or without cervical dilation (eg, laminaria), including hospital admission and visits, delivery of fetus and secundines |
| CPT | 59856 | Induced abortion, by 1 or more vaginal suppositories (eg, prostaglandin) with or without cervical dilation (eg, laminaria), including hospital admission and visits, delivery of fetus and secundines; with dilation and curettage and/or evacuation |
| CPT | 59857 | Induced abortion, by 1 or more vaginal suppositories (eg, prostaglandin) with or without cervical dilation (eg, laminaria), including hospital admission and visits, delivery of fetus and secundines; with hysterotomy (failed medical evacuation) |
| HCPCS | S0190 | Mifepristone, oral, 200 mg |
| HCPCS | S0191 | Misoprostol, oral, 200 mcg |
| HCPCS | S0199 | Med abortion inc all ex drug |
| HCPCS | S2260 | Induced abortion, 17 to 24 weeks |
| ICD-9-CM | 635xx | Legally induced abortion |
| ICD-9-CM | 636xx | Illegal abortion |
| ICD-9-CM | 7796 | Termination of pregnancy (fetus) |
| ICD-9-CM (procedure) | 750xx | Intra-Amniotic Injection For Abortion |
| ICD-9-CM (procedure) | 6901 | Dilation And Curettage For Termination Of Pregnancy |
| ICD-9-CM (procedure) | 6951 | Aspiration Curettage Of Uterus For Termination Of Pregnancy |
| ICD-9-CM (procedure) | 7491 | Hysterotomy To Terminate Pregnancy |
| ICD-10-CM | O046 | Delayed or excessive hemorrhage following (induced) termination of pregnancy |
| ICD-10-CM | O0484 | Damage to pelvic organs following (induced) termination of pregnancy |
| ICD-10-CM | O0482 | Renal failure following (induced) termination of pregnancy |
| ICD-10-CM | O0483 | Metabolic disorder following (induced) termination of pregnancy |
| ICD-10-CM | O0481 | Shock following (induced) termination of pregnancy |
| ICD-10-CM | O047 | Embolism following (induced) termination of pregnancy |
| ICD-10-CM | O0485 | Other venous complications following (induced) termination of pregnancy |
| ICD-10-CM | O0486 | Cardiac arrest following (induced) termination of pregnancy |
| ICD-10-CM | O0488 | Urinary tract infection following (induced) termination of pregnancy |
| ICD-10-CM | O0489 | (Induced) termination of pregnancy with other complications |
| ICD-10-CM | O0480 | (Induced) termination of pregnancy with unspecified complications |
| ICD-10-CM | Z332 | Encounter for elective termination of pregnancy |
| ICD-10-CM | Z332 | Encounter for elective termination of pregnancy |
| ICD-10-CM | O045 | Genital tract and pelvic infection following (induced) termination of pregnancy |
| ICD-10-PCS | 10A07ZZ | Abortion of Products of Conception, Via Natural or Artificial Opening |
| ICD-10-PCS | 10A08ZZ | Abortion of Products of Conception, Via Natural or Artificial Opening Endoscopic |
| ICD-10-PCS | 10A00ZZ | Abortion of Products of Conception, Open Approach |
| ICD-10-PCS | 10A03ZZ | Abortion of Products of Conception, Percutaneous Approach |
| ICD-10-PCS | 10A04ZZ | Abortion of Products of Conception, Percutaneous Endoscopic Approach |
| ICD-10-PCS | 10A07ZX | Abortion of Products of Conception, Abortifacient, Via Natural or Artificial Opening |

NOTES:

1. The table includes an adaptation of ICD-9-CM/ICD-10-CM / ICD-10-PCS codes and descriptions which are publicly available for download at the following location: <ftp://ftp.cdc.gov/pub/Health_Statistics/NCHS/Publications/ICD9-CM/2011>

<ftp://ftp.cdc.gov/pub/Health_Statistics/NCHS/Publications/ICD10CM/2021/>

<https://www.cms.gov/Medicare/Coding/ICD10/2018-ICD-10-PCS-and-GEMs>

1. The decimal points in the codes are removed. Codes that have a trailing “x” imply all ICD-9-CM codes with similar initial digits were included in the algorithm and description of the code may vary for subclasses of the code.

eTable 8- Spontaneous Abortion (ICD, CPT)

| Code type | Code | Code Description |
| --- | --- | --- |
| CPT | 01965 | Anesthesia for incomplete or missed abortion procedures |
| CPT | 59812 | Treatment of incomplete abortion, any trimester, completed surgically |
| CPT | 59820 | Treatment of missed abortion, completed surgically; first trimester |
| CPT | 59821 | Treatment of missed abortion, completed surgically; second trimester |
| CPT | 59830 | Treatment of septic abortion, completed surgically |
| ICD-9-CM | 632xx | Missed abortion |
| ICD-9-CM | 634xx | Spontaneous abortion |
| ICD-9-CM | 6310x | Inappropriate change in quantitative human chorionic gonadotropin (hCG) in early pregnancy |
| ICD-9-CM | 6318x | Other abnormal products of conception |
| ICD-9-CM | 6370x | Unspecified abortion complicated by genital tract and pelvic infection |
| ICD-9-CM | 6371x | Unspecified abortion complicated by delayed or excessive hemorrhage |
| ICD-10-CM | O021 | Missed abortion |
| ICD-10-CM | O0281 | Inappropriate change in quantitative human chorionic gonadotropin (hCG) in early pregnancy |
| ICD-10-CM | O020 | Blighted ovum and nonhydatidiform mole |
| ICD-10-CM | O0289 | Other abnormal products of conception |
| ICD-10-CM | O029 | Abnormal product of conception, unspecified |
| ICD-10-CM | O036 | Delayed or excessive hemorrhage following complete or unspecified spontaneous abortion |
| ICD-10-CM | O031 | Delayed or excessive hemorrhage following incomplete spontaneous abortion |
| ICD-10-CM | O0384 | Damage to pelvic organs following complete or unspecified spontaneous abortion |
| ICD-10-CM | O0334 | Damage to pelvic organs following incomplete spontaneous abortion |
| ICD-10-CM | O0382 | Renal failure following complete or unspecified spontaneous abortion |
| ICD-10-CM | O0332 | Renal failure following incomplete spontaneous abortion |
| ICD-10-CM | O0383 | Metabolic disorder following complete or unspecified spontaneous abortion |
| ICD-10-CM | O0333 | Metabolic disorder following incomplete spontaneous abortion |
| ICD-10-CM | O0381 | Shock following complete or unspecified spontaneous abortion |
| ICD-10-CM | O0331 | Shock following incomplete spontaneous abortion |
| ICD-10-CM | O037 | Embolism following complete or unspecified spontaneous abortion |
| ICD-10-CM | O032 | Embolism following incomplete spontaneous abortion |
| ICD-10-CM | O0385 | Other venous complications following complete or unspecified spontaneous abortion |
| ICD-10-CM | O0386 | Cardiac arrest following complete or unspecified spontaneous abortion |
| ICD-10-CM | O0388 | Urinary tract infection following complete or unspecified spontaneous abortion |
| ICD-10-CM | O0389 | Complete or unspecified spontaneous abortion with other complications |
| ICD-10-CM | O0335 | Other venous complications following incomplete spontaneous abortion |
| ICD-10-CM | O0336 | Cardiac arrest following incomplete spontaneous abortion |
| ICD-10-CM | O0338 | Urinary tract infection following incomplete spontaneous abortion |
| ICD-10-CM | O0339 | Incomplete spontaneous abortion with other complications |
| ICD-10-CM | O0380 | Unspecified complication following complete or unspecified spontaneous abortion |
| ICD-10-CM | O0330 | Unspecified complication following incomplete spontaneous abortion |
| ICD-10-CM | O039 | Complete or unspecified spontaneous abortion without complication |
| ICD-10-CM | O034 | Incomplete spontaneous abortion without complication |

NOTES:

1. The table includes an adaptation of ICD-9-CM/ICD-10-CM codes and descriptions which are publicly available for download at the following location: <ftp://ftp.cdc.gov/pub/Health_Statistics/NCHS/Publications/ICD9-CM/2011>

<ftp://ftp.cdc.gov/pub/Health_Statistics/NCHS/Publications/ICD10CM/2021/>

1. The decimal points in the codes are removed. Codes that have a trailing “x” imply all ICD-9-CM codes with similar initial digits were included in the algorithm and description of the code may vary for subclasses of the code.

eTable 9- Ectopic pregnancy (ICD, CPT, HCPCS)

| Code type | Code | Code Description | Category |
| --- | --- | --- | --- |
| ICD-9-CM | 633xx | Ectopic pregnancy | Ectopic pregnancy |
| CPT | 58661 | Laparoscopy, surgical; with removal of adnexal structures (partial or total oophorectomy and/or salpingectomy) | Extra unspecific procedures |
| CPT | 58673 | Laparoscopy, surgical; with salpingostomy (salpingoneostomy) | Extra unspecific procedures |
| CPT | 58700 | Salpingectomy, complete or partial, unilateral or bilateral (separate procedure) | Extra unspecific procedures |
| CPT | 58770 | Salpingostomy (salpingoneostomy) | Extra unspecific procedures |
| HCPCS | J8610 | Methotrexate; oral, 2.5 mg | Extra unspecific procedures |
| HCPCS | J9250 | Methotrexate sodium, 5 mg | Extra unspecific procedures |
| HCPCS | J9260 | Methotrexate sodium, 50 mg | Extra unspecific procedures |
| ICD-9-CM (procedure) | 6601 | Salpingotomy | Extra unspecific procedures |
| ICD-9-CM (procedure) | 6602 | Salpingostomy | Extra unspecific procedures |
| ICD-9-CM (procedure) | 6651 | Removal of both fallopian tubes at same operative episode | Extra unspecific procedures |
| ICD-9-CM (procedure) | 6652 | Removal of remaining fallopian tube | Extra unspecific procedures |
| ICD-9-CM (procedure) | 6661 | Excision or destruction of lesion of fallopian tube | Extra unspecific procedures |
| ICD-9-CM (procedure) | 6663 | Bilateral partial salpingectomy, not otherwise specified | Extra unspecific procedures |
| ICD-9-CM (procedure) | 6669 | Other partial salpingectomy | Extra unspecific procedures |
| ICD-9-CM (procedure) | 6672 | Salpingo-oophorostomy | Extra unspecific procedures |
| ICD-9-CM (procedure) | 6673 | Salpingo-salpingostomy | Extra unspecific procedures |
| ICD-9-CM (procedure) | 6662 | Salpingectomy with removal of tubal pregnancy | Specific ectopic pregnancy procedures |
| ICD-9-CM (procedure) | 743x | Removal Of Extratubal Ectopic Pregnancy | Specific ectopic pregnancy procedures |
| CPT | 59120 | Surgical treatment of ectopic pregnancy; tubal or ovarian, requiring salpingectomy and/or oophorectomy, abdominal or vaginal approach | Specific ectopic pregnancy procedures |
| CPT | 59121 | Surgical treatment of ectopic pregnancy; tubal or ovarian, without salpingectomy and/or oophorectomy | Specific ectopic pregnancy procedures |
| CPT | 59130 | Surgical treatment of ectopic pregnancy; abdominal pregnancy | Specific ectopic pregnancy procedures |
| CPT | 59135 | Surgical treatment of ectopic pregnancy; interstitial, uterine pregnancy requiring total hysterectomy | Specific ectopic pregnancy procedures |
| CPT | 59136 | Surgical treatment of ectopic pregnancy; interstitial, uterine pregnancy with partial resection of uterus | Specific ectopic pregnancy procedures |
| CPT | 59140 | Surgical treatment of ectopic pregnancy; cervical, with evacuation | Specific ectopic pregnancy procedures |
| CPT | 59150 | Laparoscopic treatment of ectopic pregnancy; without salpingectomy and/or oophorectomy | Specific ectopic pregnancy procedures |
| CPT | 59151 | Laparoscopic treatment of ectopic pregnancy; with salpingectomy and/or oophorectomy | Specific ectopic pregnancy procedures |
| ICD-10-CM | O00x | Ectopic pregnancy | Ectopic pregnancy |
| ICD-10-PCS | 0U950ZZ | Drainage of Right Fallopian Tube, Open Approach | Extra unspecific procedures |
| ICD-10-PCS | 0U960ZZ | Drainage of Left Fallopian Tube, Open Approach | Extra unspecific procedures |
| ICD-10-PCS | 0U970ZZ | Drainage of Bilateral Fallopian Tubes, Open Approach | Extra unspecific procedures |
| ICD-10-PCS | 0UC50ZZ | Extirpation of Matter from Right Fallopian Tube, Open Approach | Extra unspecific procedures |
| ICD-10-PCS | 0UC53ZZ | Extirpation of Matter from Right Fallopian Tube, Percutaneous Approach | Extra unspecific procedures |
| ICD-10-PCS | 0UC54ZZ | Extirpation of Matter from Right Fallopian Tube, Percutaneous Endoscopic Approach | Extra unspecific procedures |
| ICD-10-PCS | 0UC57ZZ | Extirpation of Matter from Right Fallopian Tube, Via Natural or Artificial Opening | Extra unspecific procedures |
| ICD-10-PCS | 0UC58ZZ | Extirpation of Matter from Right Fallopian Tube, Via Natural or Artificial Opening Endoscopic | Extra unspecific procedures |
| ICD-10-PCS | 0UC60ZZ | Extirpation of Matter from Left Fallopian Tube, Open Approach | Extra unspecific procedures |
| ICD-10-PCS | 0UC63ZZ | Extirpation of Matter from Left Fallopian Tube, Percutaneous Approach | Extra unspecific procedures |
| ICD-10-PCS | 0UC64ZZ | Extirpation of Matter from Left Fallopian Tube, Percutaneous Endoscopic Approach | Extra unspecific procedures |
| ICD-10-PCS | 0UC67ZZ | Extirpation of Matter from Left Fallopian Tube, Via Natural or Artificial Opening | Extra unspecific procedures |
| ICD-10-PCS | 0UC68ZZ | Extirpation of Matter from Left Fallopian Tube, Via Natural or Artificial Opening Endoscopic | Extra unspecific procedures |
| ICD-10-PCS | 0UC70ZZ | Extirpation of Matter from Bilateral Fallopian Tubes, Open Approach | Extra unspecific procedures |
| ICD-10-PCS | 0UC73ZZ | Extirpation of Matter from Bilateral Fallopian Tubes, Percutaneous Approach | Extra unspecific procedures |
| ICD-10-PCS | 0UC74ZZ | Extirpation of Matter from Bilateral Fallopian Tubes, Percutaneous Endoscopic Approach | Extra unspecific procedures |
| ICD-10-PCS | 0UC77ZZ | Extirpation of Matter from Bilateral Fallopian Tubes, Via Natural or Artificial Opening | Extra unspecific procedures |
| ICD-10-PCS | 0UC78ZZ | Extirpation of Matter from Bilateral Fallopian Tubes, Via Natural or Artificial Opening Endoscopic | Extra unspecific procedures |
| ICD-10-PCS | 0UH80YZ | Insertion of Other Device into Fallopian Tube, Open Approach | Extra unspecific procedures |
| ICD-10-PCS | 0UH83YZ | Insertion of Other Device into Fallopian Tube, Percutaneous Approach | Extra unspecific procedures |
| ICD-10-PCS | 0UH84YZ | Insertion of Other Device into Fallopian Tube, Percutaneous Endoscopic Approach | Extra unspecific procedures |
| ICD-10-PCS | 0UP800Z | Removal of Drainage Device from Fallopian Tube, Open Approach | Extra unspecific procedures |
| ICD-10-PCS | 0UP803Z | Removal of Infusion Device from Fallopian Tube, Open Approach | Extra unspecific procedures |
| ICD-10-PCS | 0UP807Z | Removal of Autologous Tissue Substitute from Fallopian Tube, Open Approach | Extra unspecific procedures |
| ICD-10-PCS | 0UP80CZ | Removal of Extraluminal Device from Fallopian Tube, Open Approach | Extra unspecific procedures |
| ICD-10-PCS | 0UP80DZ | Removal of Intraluminal Device from Fallopian Tube, Open Approach | Extra unspecific procedures |
| ICD-10-PCS | 0UP80KZ | Removal of Nonautologous Tissue Substitute from Fallopian Tube, Open Approach | Extra unspecific procedures |
| ICD-10-PCS | 0UP80YZ | Removal of Other Device from Fallopian Tube, Open Approach | Extra unspecific procedures |
| ICD-10-PCS | 0UP830Z | Removal of Drainage Device from Fallopian Tube, Percutaneous Approach | Extra unspecific procedures |
| ICD-10-PCS | 0UP833Z | Removal of Infusion Device from Fallopian Tube, Percutaneous Approach | Extra unspecific procedures |
| ICD-10-PCS | 0UP837Z | Removal of Autologous Tissue Substitute from Fallopian Tube, Percutaneous Approach | Extra unspecific procedures |
| ICD-10-PCS | 0UP83CZ | Removal of Extraluminal Device from Fallopian Tube, Percutaneous Approach | Extra unspecific procedures |
| ICD-10-PCS | 0UP83DZ | Removal of Intraluminal Device from Fallopian Tube, Percutaneous Approach | Extra unspecific procedures |
| ICD-10-PCS | 0UP83KZ | Removal of Nonautologous Tissue Substitute from Fallopian Tube, Percutaneous Approach | Extra unspecific procedures |
| ICD-10-PCS | 0UP83YZ | Removal of Other Device from Fallopian Tube, Percutaneous Approach | Extra unspecific procedures |
| ICD-10-PCS | 0UP840Z | Removal of Drainage Device from Fallopian Tube, Percutaneous Endoscopic Approach | Extra unspecific procedures |
| ICD-10-PCS | 0UP843Z | Removal of Infusion Device from Fallopian Tube, Percutaneous Endoscopic Approach | Extra unspecific procedures |
| ICD-10-PCS | 0UP847Z | Removal of Autologous Tissue Substitute from Fallopian Tube, Percutaneous Endoscopic Approach | Extra unspecific procedures |
| ICD-10-PCS | 0UP84CZ | Removal of Extraluminal Device from Fallopian Tube, Percutaneous Endoscopic Approach | Extra unspecific procedures |
| ICD-10-PCS | 0UP84DZ | Removal of Intraluminal Device from Fallopian Tube, Percutaneous Endoscopic Approach | Extra unspecific procedures |
| ICD-10-PCS | 0UP84KZ | Removal of Nonautologous Tissue Substitute from Fallopian Tube, Percutaneous Endoscopic Approach | Extra unspecific procedures |
| ICD-10-PCS | 0UP84YZ | Removal of Other Device from Fallopian Tube, Percutaneous Endoscopic Approach | Extra unspecific procedures |
| ICD-10-PCS | 0UP877Z | Removal of Autologous Tissue Substitute from Fallopian Tube, Via Natural or Artificial Opening | Extra unspecific procedures |
| ICD-10-PCS | 0UP87CZ | Removal of Extraluminal Device from Fallopian Tube, Via Natural or Artificial Opening | Extra unspecific procedures |
| ICD-10-PCS | 0UP87KZ | Removal of Nonautologous Tissue Substitute from Fallopian Tube, Via Natural or Artificial Opening | Extra unspecific procedures |
| ICD-10-PCS | 0UP887Z | Removal of Autologous Tissue Substitute from Fallopian Tube, Via Natural or Artificial Opening Endoscopic | Extra unspecific procedures |
| ICD-10-PCS | 0UP88CZ | Removal of Extraluminal Device from Fallopian Tube, Via Natural or Artificial Opening Endoscopic | Extra unspecific procedures |
| ICD-10-PCS | 0UP88KZ | Removal of Nonautologous Tissue Substitute from Fallopian Tube, Via Natural or Artificial Opening Endoscopic | Extra unspecific procedures |
| ICD-10-PCS | 0UW800Z | Revision of Drainage Device in Fallopian Tube, Open Approach | Extra unspecific procedures |
| ICD-10-PCS | 0UW803Z | Revision of Infusion Device in Fallopian Tube, Open Approach | Extra unspecific procedures |
| ICD-10-PCS | 0UW807Z | Revision of Autologous Tissue Substitute in Fallopian Tube, Open Approach | Extra unspecific procedures |
| ICD-10-PCS | 0UW80CZ | Revision of Extraluminal Device in Fallopian Tube, Open Approach | Extra unspecific procedures |
| ICD-10-PCS | 0UW80DZ | Revision of Intraluminal Device in Fallopian Tube, Open Approach | Extra unspecific procedures |
| ICD-10-PCS | 0UW80JZ | Revision of Synthetic Substitute in Fallopian Tube, Open Approach | Extra unspecific procedures |
| ICD-10-PCS | 0UW80KZ | Revision of Nonautologous Tissue Substitute in Fallopian Tube, Open Approach | Extra unspecific procedures |
| ICD-10-PCS | 0UW80YZ | Revision of Other Device in Fallopian Tube, Open Approach | Extra unspecific procedures |
| ICD-10-PCS | 0UW830Z | Revision of Drainage Device in Fallopian Tube, Percutaneous Approach | Extra unspecific procedures |
| ICD-10-PCS | 0UW833Z | Revision of Infusion Device in Fallopian Tube, Percutaneous Approach | Extra unspecific procedures |
| ICD-10-PCS | 0UW837Z | Revision of Autologous Tissue Substitute in Fallopian Tube, Percutaneous Approach | Extra unspecific procedures |
| ICD-10-PCS | 0UW83CZ | Revision of Extraluminal Device in Fallopian Tube, Percutaneous Approach | Extra unspecific procedures |
| ICD-10-PCS | 0UW83DZ | Revision of Intraluminal Device in Fallopian Tube, Percutaneous Approach | Extra unspecific procedures |
| ICD-10-PCS | 0UW83JZ | Revision of Synthetic Substitute in Fallopian Tube, Percutaneous Approach | Extra unspecific procedures |
| ICD-10-PCS | 0UW83KZ | Revision of Nonautologous Tissue Substitute in Fallopian Tube, Percutaneous Approach | Extra unspecific procedures |
| ICD-10-PCS | 0UW83YZ | Revision of Other Device in Fallopian Tube, Percutaneous Approach | Extra unspecific procedures |
| ICD-10-PCS | 0UW840Z | Revision of Drainage Device in Fallopian Tube, Percutaneous Endoscopic Approach | Extra unspecific procedures |
| ICD-10-PCS | 0UW843Z | Revision of Infusion Device in Fallopian Tube, Percutaneous Endoscopic Approach | Extra unspecific procedures |
| ICD-10-PCS | 0UW847Z | Revision of Autologous Tissue Substitute in Fallopian Tube, Percutaneous Endoscopic Approach | Extra unspecific procedures |
| ICD-10-PCS | 0UW84CZ | Revision of Extraluminal Device in Fallopian Tube, Percutaneous Endoscopic Approach | Extra unspecific procedures |
| ICD-10-PCS | 0UW84DZ | Revision of Intraluminal Device in Fallopian Tube, Percutaneous Endoscopic Approach | Extra unspecific procedures |
| ICD-10-PCS | 0UW84JZ | Revision of Synthetic Substitute in Fallopian Tube, Percutaneous Endoscopic Approach | Extra unspecific procedures |
| ICD-10-PCS | 0UW84KZ | Revision of Nonautologous Tissue Substitute in Fallopian Tube, Percutaneous Endoscopic Approach | Extra unspecific procedures |
| ICD-10-PCS | 0UW84YZ | Revision of Other Device in Fallopian Tube, Percutaneous Endoscopic Approach | Extra unspecific procedures |
| ICD-10-PCS | 0UW870Z | Revision of Drainage Device in Fallopian Tube, Via Natural or Artificial Opening | Extra unspecific procedures |
| ICD-10-PCS | 0UW873Z | Revision of Infusion Device in Fallopian Tube, Via Natural or Artificial Opening | Extra unspecific procedures |
| ICD-10-PCS | 0UW877Z | Revision of Autologous Tissue Substitute in Fallopian Tube, Via Natural or Artificial Opening | Extra unspecific procedures |
| ICD-10-PCS | 0UW87CZ | Revision of Extraluminal Device in Fallopian Tube, Via Natural or Artificial Opening | Extra unspecific procedures |
| ICD-10-PCS | 0UW87DZ | Revision of Intraluminal Device in Fallopian Tube, Via Natural or Artificial Opening | Extra unspecific procedures |
| ICD-10-PCS | 0UW87JZ | Revision of Synthetic Substitute in Fallopian Tube, Via Natural or Artificial Opening | Extra unspecific procedures |
| ICD-10-PCS | 0UW87KZ | Revision of Nonautologous Tissue Substitute in Fallopian Tube, Via Natural or Artificial Opening | Extra unspecific procedures |
| ICD-10-PCS | 0UW87YZ | Revision of Other Device in Fallopian Tube, Via Natural or Artificial Opening | Extra unspecific procedures |
| ICD-10-PCS | 0UW880Z | Revision of Drainage Device in Fallopian Tube, Via Natural or Artificial Opening Endoscopic | Extra unspecific procedures |
| ICD-10-PCS | 0UW883Z | Revision of Infusion Device in Fallopian Tube, Via Natural or Artificial Opening Endoscopic | Extra unspecific procedures |
| ICD-10-PCS | 0UW887Z | Revision of Autologous Tissue Substitute in Fallopian Tube, Via Natural or Artificial Opening Endoscopic | Extra unspecific procedures |
| ICD-10-PCS | 0UW88CZ | Revision of Extraluminal Device in Fallopian Tube, Via Natural or Artificial Opening Endoscopic | Extra unspecific procedures |
| ICD-10-PCS | 0UW88DZ | Revision of Intraluminal Device in Fallopian Tube, Via Natural or Artificial Opening Endoscopic | Extra unspecific procedures |
| ICD-10-PCS | 0UW88JZ | Revision of Synthetic Substitute in Fallopian Tube, Via Natural or Artificial Opening Endoscopic | Extra unspecific procedures |
| ICD-10-PCS | 0UW88KZ | Revision of Nonautologous Tissue Substitute in Fallopian Tube, Via Natural or Artificial Opening Endoscopic | Extra unspecific procedures |
| ICD-10-PCS | 0UW88YZ | Revision of Other Device in Fallopian Tube, Via Natural or Artificial Opening Endoscopic | Extra unspecific procedures |
| ICD-10-PCS | 0U9500Z | Drainage of Right Fallopian Tube with Drainage Device, Open Approach | Extra unspecific procedures |
| ICD-10-PCS | 0U9540Z | Drainage of Right Fallopian Tube with Drainage Device, Percutaneous Endoscopic Approach | Extra unspecific procedures |
| ICD-10-PCS | 0U9570Z | Drainage of Right Fallopian Tube with Drainage Device, Via Natural or Artificial Opening | Extra unspecific procedures |
| ICD-10-PCS | 0U9580Z | Drainage of Right Fallopian Tube with Drainage Device, Via Natural or Artificial Opening Endoscopic | Extra unspecific procedures |
| ICD-10-PCS | 0U9600Z | Drainage of Left Fallopian Tube with Drainage Device, Open Approach | Extra unspecific procedures |
| ICD-10-PCS | 0U9640Z | Drainage of Left Fallopian Tube with Drainage Device, Percutaneous Endoscopic Approach | Extra unspecific procedures |
| ICD-10-PCS | 0U9670Z | Drainage of Left Fallopian Tube with Drainage Device, Via Natural or Artificial Opening | Extra unspecific procedures |
| ICD-10-PCS | 0U9680Z | Drainage of Left Fallopian Tube with Drainage Device, Via Natural or Artificial Opening Endoscopic | Extra unspecific procedures |
| ICD-10-PCS | 0U9700Z | Drainage of Bilateral Fallopian Tubes with Drainage Device, Open Approach | Extra unspecific procedures |
| ICD-10-PCS | 0U9740Z | Drainage of Bilateral Fallopian Tubes with Drainage Device, Percutaneous Endoscopic Approach | Extra unspecific procedures |
| ICD-10-PCS | 0U9770Z | Drainage of Bilateral Fallopian Tubes with Drainage Device, Via Natural or Artificial Opening | Extra unspecific procedures |
| ICD-10-PCS | 0U9780Z | Drainage of Bilateral Fallopian Tubes with Drainage Device, Via Natural or Artificial Opening Endoscopic | Extra unspecific procedures |
| ICD-10-PCS | 10D27ZZ | Extraction of Products of Conception, Ectopic, Via Natural or Artificial Opening | Extra unspecific procedures |
| ICD-10-PCS | 10D28ZZ | Extraction of Products of Conception, Ectopic, Via Natural or Artificial Opening Endoscopic | Extra unspecific procedures |
| ICD-10-PCS | 10T27ZZ | Resection of Products of Conception, Ectopic, Via Natural or Artificial Opening | Extra unspecific procedures |
| ICD-10-PCS | 10T28ZZ | Resection of Products of Conception, Ectopic, Via Natural or Artificial Opening Endoscopic | Extra unspecific procedures |
| ICD-10-PCS | 0UT70ZZ | Resection of Bilateral Fallopian Tubes, Open Approach | Extra unspecific procedures |
| ICD-10-PCS | 0UT74ZZ | Resection of Bilateral Fallopian Tubes, Percutaneous Endoscopic Approach | Extra unspecific procedures |
| ICD-10-PCS | 0UT77ZZ | Resection of Bilateral Fallopian Tubes, Via Natural or Artificial Opening | Extra unspecific procedures |
| ICD-10-PCS | 0UT78ZZ | Resection of Bilateral Fallopian Tubes, Via Natural or Artificial Opening Endoscopic | Extra unspecific procedures |
| ICD-10-PCS | 0UT7FZZ | Resection of Bilateral Fallopian Tubes, Via Natural or Artificial Opening With Percutaneous Endoscopic Assistance | Extra unspecific procedures |
| ICD-10-PCS | 0UT50ZZ | Resection of Right Fallopian Tube, Open Approach | Extra unspecific procedures |
| ICD-10-PCS | 0UT54ZZ | Resection of Right Fallopian Tube, Percutaneous Endoscopic Approach | Extra unspecific procedures |
| ICD-10-PCS | 0UT57ZZ | Resection of Right Fallopian Tube, Via Natural or Artificial Opening | Extra unspecific procedures |
| ICD-10-PCS | 0UT58ZZ | Resection of Right Fallopian Tube, Via Natural or Artificial Opening Endoscopic | Extra unspecific procedures |
| ICD-10-PCS | 0UT5FZZ | Resection of Right Fallopian Tube, Via Natural or Artificial Opening With Percutaneous Endoscopic Assistance | Extra unspecific procedures |
| ICD-10-PCS | 0UT60ZZ | Resection of Left Fallopian Tube, Open Approach | Extra unspecific procedures |
| ICD-10-PCS | 0UT64ZZ | Resection of Left Fallopian Tube, Percutaneous Endoscopic Approach | Extra unspecific procedures |
| ICD-10-PCS | 0UT67ZZ | Resection of Left Fallopian Tube, Via Natural or Artificial Opening | Extra unspecific procedures |
| ICD-10-PCS | 0UT68ZZ | Resection of Left Fallopian Tube, Via Natural or Artificial Opening Endoscopic | Extra unspecific procedures |
| ICD-10-PCS | 0UT6FZZ | Resection of Left Fallopian Tube, Via Natural or Artificial Opening With Percutaneous Endoscopic Assistance | Extra unspecific procedures |
| ICD-10-PCS | 0U550ZZ | Destruction of Right Fallopian Tube, Open Approach | Extra unspecific procedures |
| ICD-10-PCS | 0U553ZZ | Destruction of Right Fallopian Tube, Percutaneous Approach | Extra unspecific procedures |
| ICD-10-PCS | 0U554ZZ | Destruction of Right Fallopian Tube, Percutaneous Endoscopic Approach | Extra unspecific procedures |
| ICD-10-PCS | 0U557ZZ | Destruction of Right Fallopian Tube, Via Natural or Artificial Opening | Extra unspecific procedures |
| ICD-10-PCS | 0U558ZZ | Destruction of Right Fallopian Tube, Via Natural or Artificial Opening Endoscopic | Extra unspecific procedures |
| ICD-10-PCS | 0U560ZZ | Destruction of Left Fallopian Tube, Open Approach | Extra unspecific procedures |
| ICD-10-PCS | 0U563ZZ | Destruction of Left Fallopian Tube, Percutaneous Approach | Extra unspecific procedures |
| ICD-10-PCS | 0U564ZZ | Destruction of Left Fallopian Tube, Percutaneous Endoscopic Approach | Extra unspecific procedures |
| ICD-10-PCS | 0U567ZZ | Destruction of Left Fallopian Tube, Via Natural or Artificial Opening | Extra unspecific procedures |
| ICD-10-PCS | 0U568ZZ | Destruction of Left Fallopian Tube, Via Natural or Artificial Opening Endoscopic | Extra unspecific procedures |
| ICD-10-PCS | 0U570ZZ | Destruction of Bilateral Fallopian Tubes, Open Approach | Extra unspecific procedures |
| ICD-10-PCS | 0U573ZZ | Destruction of Bilateral Fallopian Tubes, Percutaneous Approach | Extra unspecific procedures |
| ICD-10-PCS | 0U574ZZ | Destruction of Bilateral Fallopian Tubes, Percutaneous Endoscopic Approach | Extra unspecific procedures |
| ICD-10-PCS | 0U577ZZ | Destruction of Bilateral Fallopian Tubes, Via Natural or Artificial Opening | Extra unspecific procedures |
| ICD-10-PCS | 0U578ZZ | Destruction of Bilateral Fallopian Tubes, Via Natural or Artificial Opening Endoscopic | Extra unspecific procedures |
| ICD-10-PCS | 0UB50ZZ | Excision of Right Fallopian Tube, Open Approach | Extra unspecific procedures |
| ICD-10-PCS | 0UB53ZZ | Excision of Right Fallopian Tube, Percutaneous Approach | Extra unspecific procedures |
| ICD-10-PCS | 0UB54ZZ | Excision of Right Fallopian Tube, Percutaneous Endoscopic Approach | Extra unspecific procedures |
| ICD-10-PCS | 0UB57ZZ | Excision of Right Fallopian Tube, Via Natural or Artificial Opening | Extra unspecific procedures |
| ICD-10-PCS | 0UB58ZZ | Excision of Right Fallopian Tube, Via Natural or Artificial Opening Endoscopic | Extra unspecific procedures |
| ICD-10-PCS | 0UB60ZZ | Excision of Left Fallopian Tube, Open Approach | Extra unspecific procedures |
| ICD-10-PCS | 0UB63ZZ | Excision of Left Fallopian Tube, Percutaneous Approach | Extra unspecific procedures |
| ICD-10-PCS | 0UB64ZZ | Excision of Left Fallopian Tube, Percutaneous Endoscopic Approach | Extra unspecific procedures |
| ICD-10-PCS | 0UB67ZZ | Excision of Left Fallopian Tube, Via Natural or Artificial Opening | Extra unspecific procedures |
| ICD-10-PCS | 0UB68ZZ | Excision of Left Fallopian Tube, Via Natural or Artificial Opening Endoscopic | Extra unspecific procedures |
| ICD-10-PCS | 10T20ZZ | Resection of Products of Conception, Ectopic, Open Approach | Extra unspecific procedures |
| ICD-10-PCS | 10T23ZZ | Resection of Products of Conception, Ectopic, Percutaneous Approach | Extra unspecific procedures |
| ICD-10-PCS | 10T24ZZ | Resection of Products of Conception, Ectopic, Percutaneous Endoscopic Approach | Extra unspecific procedures |
| ICD-10-PCS | 0UB70ZZ | Excision of Bilateral Fallopian Tubes, Open Approach | Extra unspecific procedures |
| ICD-10-PCS | 0UB73ZZ | Excision of Bilateral Fallopian Tubes, Percutaneous Approach | Extra unspecific procedures |
| ICD-10-PCS | 0UB74ZZ | Excision of Bilateral Fallopian Tubes, Percutaneous Endoscopic Approach | Extra unspecific procedures |
| ICD-10-PCS | 0UB77ZZ | Excision of Bilateral Fallopian Tubes, Via Natural or Artificial Opening | Extra unspecific procedures |
| ICD-10-PCS | 0UB78ZZ | Excision of Bilateral Fallopian Tubes, Via Natural or Artificial Opening Endoscopic | Extra unspecific procedures |
| ICD-10-PCS | 0UQ50ZZ | Repair Right Fallopian Tube, Open Approach | Extra unspecific procedures |
| ICD-10-PCS | 0UQ53ZZ | Repair Right Fallopian Tube, Percutaneous Approach | Extra unspecific procedures |
| ICD-10-PCS | 0UQ54ZZ | Repair Right Fallopian Tube, Percutaneous Endoscopic Approach | Extra unspecific procedures |
| ICD-10-PCS | 0UQ57ZZ | Repair Right Fallopian Tube, Via Natural or Artificial Opening | Extra unspecific procedures |
| ICD-10-PCS | 0UQ58ZZ | Repair Right Fallopian Tube, Via Natural or Artificial Opening Endoscopic | Extra unspecific procedures |
| ICD-10-PCS | 0UQ60ZZ | Repair Left Fallopian Tube, Open Approach | Extra unspecific procedures |
| ICD-10-PCS | 0UQ63ZZ | Repair Left Fallopian Tube, Percutaneous Approach | Extra unspecific procedures |
| ICD-10-PCS | 0UQ64ZZ | Repair Left Fallopian Tube, Percutaneous Endoscopic Approach | Extra unspecific procedures |
| ICD-10-PCS | 0UQ67ZZ | Repair Left Fallopian Tube, Via Natural or Artificial Opening | Extra unspecific procedures |
| ICD-10-PCS | 0UQ68ZZ | Repair Left Fallopian Tube, Via Natural or Artificial Opening Endoscopic | Extra unspecific procedures |
| ICD-10-PCS | 0U15075 | Bypass Right Fallopian Tube to Right Fallopian Tube with Autologous Tissue Substitute, Open Approach | Extra unspecific procedures |
| ICD-10-PCS | 0U15076 | Bypass Right Fallopian Tube to Left Fallopian Tube with Autologous Tissue Substitute, Open Approach | Extra unspecific procedures |
| ICD-10-PCS | 0U150J5 | Bypass Right Fallopian Tube to Right Fallopian Tube with Synthetic Substitute, Open Approach | Extra unspecific procedures |
| ICD-10-PCS | 0U150J6 | Bypass Right Fallopian Tube to Left Fallopian Tube with Synthetic Substitute, Open Approach | Extra unspecific procedures |
| ICD-10-PCS | 0U150K5 | Bypass Right Fallopian Tube to Right Fallopian Tube with Nonautologous Tissue Substitute, Open Approach | Extra unspecific procedures |
| ICD-10-PCS | 0U150K6 | Bypass Right Fallopian Tube to Left Fallopian Tube with Nonautologous Tissue Substitute, Open Approach | Extra unspecific procedures |
| ICD-10-PCS | 0U150Z5 | Bypass Right Fallopian Tube to Right Fallopian Tube, Open Approach | Extra unspecific procedures |
| ICD-10-PCS | 0U150Z6 | Bypass Right Fallopian Tube to Left Fallopian Tube, Open Approach | Extra unspecific procedures |
| ICD-10-PCS | 0U15475 | Bypass Right Fallopian Tube to Right Fallopian Tube with Autologous Tissue Substitute, Percutaneous Endoscopic Approach | Extra unspecific procedures |
| ICD-10-PCS | 0U15476 | Bypass Right Fallopian Tube to Left Fallopian Tube with Autologous Tissue Substitute, Percutaneous Endoscopic Approach | Extra unspecific procedures |
| ICD-10-PCS | 0U154J5 | Bypass Right Fallopian Tube to Right Fallopian Tube with Synthetic Substitute, Percutaneous Endoscopic Approach | Extra unspecific procedures |
| ICD-10-PCS | 0U154J6 | Bypass Right Fallopian Tube to Left Fallopian Tube with Synthetic Substitute, Percutaneous Endoscopic Approach | Extra unspecific procedures |
| ICD-10-PCS | 0U154K5 | Bypass Right Fallopian Tube to Right Fallopian Tube with Nonautologous Tissue Substitute, Percutaneous Endoscopic Approach | Extra unspecific procedures |
| ICD-10-PCS | 0U154K6 | Bypass Right Fallopian Tube to Left Fallopian Tube with Nonautologous Tissue Substitute, Percutaneous Endoscopic Approach | Extra unspecific procedures |
| ICD-10-PCS | 0U154Z5 | Bypass Right Fallopian Tube to Right Fallopian Tube, Percutaneous Endoscopic Approach | Extra unspecific procedures |
| ICD-10-PCS | 0U154Z6 | Bypass Right Fallopian Tube to Left Fallopian Tube, Percutaneous Endoscopic Approach | Extra unspecific procedures |
| ICD-10-PCS | 0U16075 | Bypass Left Fallopian Tube to Right Fallopian Tube with Autologous Tissue Substitute, Open Approach | Extra unspecific procedures |
| ICD-10-PCS | 0U16076 | Bypass Left Fallopian Tube to Left Fallopian Tube with Autologous Tissue Substitute, Open Approach | Extra unspecific procedures |
| ICD-10-PCS | 0U160J5 | Bypass Left Fallopian Tube to Right Fallopian Tube with Synthetic Substitute, Open Approach | Extra unspecific procedures |
| ICD-10-PCS | 0U160J6 | Bypass Left Fallopian Tube to Left Fallopian Tube with Synthetic Substitute, Open Approach | Extra unspecific procedures |
| ICD-10-PCS | 0U160K5 | Bypass Left Fallopian Tube to Right Fallopian Tube with Nonautologous Tissue Substitute, Open Approach | Extra unspecific procedures |
| ICD-10-PCS | 0U160K6 | Bypass Left Fallopian Tube to Left Fallopian Tube with Nonautologous Tissue Substitute, Open Approach | Extra unspecific procedures |
| ICD-10-PCS | 0U160Z5 | Bypass Left Fallopian Tube to Right Fallopian Tube, Open Approach | Extra unspecific procedures |
| ICD-10-PCS | 0U160Z6 | Bypass Left Fallopian Tube to Left Fallopian Tube, Open Approach | Extra unspecific procedures |
| ICD-10-PCS | 0U16475 | Bypass Left Fallopian Tube to Right Fallopian Tube with Autologous Tissue Substitute, Percutaneous Endoscopic Approach | Extra unspecific procedures |
| ICD-10-PCS | 0U16476 | Bypass Left Fallopian Tube to Left Fallopian Tube with Autologous Tissue Substitute, Percutaneous Endoscopic Approach | Extra unspecific procedures |
| ICD-10-PCS | 0U164J5 | Bypass Left Fallopian Tube to Right Fallopian Tube with Synthetic Substitute, Percutaneous Endoscopic Approach | Extra unspecific procedures |
| ICD-10-PCS | 0U164J6 | Bypass Left Fallopian Tube to Left Fallopian Tube with Synthetic Substitute, Percutaneous Endoscopic Approach | Extra unspecific procedures |
| ICD-10-PCS | 0U164K5 | Bypass Left Fallopian Tube to Right Fallopian Tube with Nonautologous Tissue Substitute, Percutaneous Endoscopic Approach | Extra unspecific procedures |
| ICD-10-PCS | 0U164K6 | Bypass Left Fallopian Tube to Left Fallopian Tube with Nonautologous Tissue Substitute, Percutaneous Endoscopic Approach | Extra unspecific procedures |
| ICD-10-PCS | 0U164Z5 | Bypass Left Fallopian Tube to Right Fallopian Tube, Percutaneous Endoscopic Approach | Extra unspecific procedures |
| ICD-10-PCS | 0U164Z6 | Bypass Left Fallopian Tube to Left Fallopian Tube, Percutaneous Endoscopic Approach | Extra unspecific procedures |
| ICD-10-PCS | 0UB50ZZ | Excision of Right Fallopian Tube, Open Approach | Extra unspecific procedures |
| ICD-10-PCS | 0UB53ZZ | Excision of Right Fallopian Tube, Percutaneous Approach | Extra unspecific procedures |
| ICD-10-PCS | 0UB54ZZ | Excision of Right Fallopian Tube, Percutaneous Endoscopic Approach | Extra unspecific procedures |
| ICD-10-PCS | 0UB57ZZ | Excision of Right Fallopian Tube, Via Natural or Artificial Opening | Extra unspecific procedures |
| ICD-10-PCS | 0UB58ZZ | Excision of Right Fallopian Tube, Via Natural or Artificial Opening Endoscopic | Extra unspecific procedures |
| ICD-10-PCS | 0UB60ZZ | Excision of Left Fallopian Tube, Open Approach | Extra unspecific procedures |
| ICD-10-PCS | 0UB63ZZ | Excision of Left Fallopian Tube, Percutaneous Approach | Extra unspecific procedures |
| ICD-10-PCS | 0UB64ZZ | Excision of Left Fallopian Tube, Percutaneous Endoscopic Approach | Extra unspecific procedures |
| ICD-10-PCS | 0UB67ZZ | Excision of Left Fallopian Tube, Via Natural or Artificial Opening | Extra unspecific procedures |
| ICD-10-PCS | 0UB68ZZ | Excision of Left Fallopian Tube, Via Natural or Artificial Opening Endoscopic | Extra unspecific procedures |
| ICD-10-PCS | 0UT50ZZ | Resection of Right Fallopian Tube, Open Approach | Extra unspecific procedures |
| ICD-10-PCS | 0UT54ZZ | Resection of Right Fallopian Tube, Percutaneous Endoscopic Approach | Extra unspecific procedures |
| ICD-10-PCS | 0UT60ZZ | Resection of Left Fallopian Tube, Open Approach | Extra unspecific procedures |
| ICD-10-PCS | 0UT64ZZ | Resection of Left Fallopian Tube, Percutaneous Endoscopic Approach | Extra unspecific procedures |
| ICD-10-PCS | 10T27ZZ | Resection of Products of Conception, Ectopic, Via Natural or Artificial Opening | Extra unspecific procedures |
| ICD-10-PCS | 10T28ZZ | Resection of Products of Conception, Ectopic, Via Natural or Artificial Opening Endoscopic | Extra unspecific procedures |
| ICD-10-PCS | 10T20ZZ | Resection of Products of Conception, Ectopic, Open Approach | Specific ectopic pregnancy procedures |
| ICD-10-PCS | 10T23ZZ | Resection of Products of Conception, Ectopic, Percutaneous Approach | Specific ectopic pregnancy procedures |
| ICD-10-PCS | 10T24ZZ | Resection of Products of Conception, Ectopic, Percutaneous Endoscopic Approach | Specific ectopic pregnancy procedures |
| ICD-10-PCS | 10D27ZZ | Extraction of Products of Conception, Ectopic, Via Natural or Artificial Opening | Specific ectopic pregnancy procedures |
| ICD-10-PCS | 10D28ZZ | Extraction of Products of Conception, Ectopic, Via Natural or Artificial Opening Endoscopic | Specific ectopic pregnancy procedures |

NOTES:

1. The table includes an adaptation of ICD-9-CM/ICD-10-CM /ICD-10-PCS codes and descriptions which are publicly available for download at the following location: <ftp://ftp.cdc.gov/pub/Health_Statistics/NCHS/Publications/ICD9-CM/2011>

<ftp://ftp.cdc.gov/pub/Health_Statistics/NCHS/Publications/ICD10CM/2021/>

<https://www.cms.gov/Medicare/Coding/ICD10/2018-ICD-10-PCS-and-GEMs>

1. The decimal points in the codes are removed. Codes that have a trailing “x” imply all ICD-9-CM codes with similar initial digits were included in the algorithm and description of the code may vary for subclasses of the code.

eTable 10- Prenatal code for pregnancy with unknown outcome (ICD, CPT)

| Code Type | Code | Code Description | Trimester |
| --- | --- | --- | --- |
| CPT | 59015 | Chorionic villus sampling, any method | prenatal procedure |
| CPT | 76801 | Ultrasound, pregnant uterus, real time with image documentation, fetal and maternal evaluation, first trimester (< 14 weeks 0 days), transabdominal approach; single or first gestation | prenatal procedure |
| CPT | 76802 | Ultrasound, pregnant uterus, real time with image documentation, fetal and maternal evaluation, first trimester (< 14 weeks 0 days), transabdominal approach; each additional gestation (List separately in addition to code for primary procedure) | prenatal procedure |
| CPT | 76813 | Ultrasound, pregnant uterus, real time with image documentation, first trimester fetal nuchal translucency measurement, transabdominal or transvaginal approach; single or first gestation | prenatal procedure |
| CPT | 76814 | Ultrasound, pregnant uterus, real time with image documentation, first trimester fetal nuchal translucency measurement, transabdominal or transvaginal approach; each additional gestation (List separately in addition to code for primary procedure) | prenatal procedure |
| CPT | 76945 | Ultrasonic guidance for chorionic villus sampling, imaging supervision and interpretation | prenatal procedure |
| CPT | 84163 | Pregnancy-associated plasma protein-A (PAPP-A) | prenatal procedure |
| ICD-9-CM | V22xx | Normal pregnancy | Unspecified |
| ICD-9-CM | V23xx | Supervision of high-risk pregnancy | Unspecified |
| ICD-9-CM | V283x | Encounter for routine screening for malformation using ultrasonics | Unspecified |
| ICD-9-CM | V7242 | Pregnancy examination or test, positive result | Unspecified |
| ICD-10-CM | Z3401 | Encounter for supervision of normal first pregnancy, first trimester | First |
| ICD-10-CM | Z3481 | Encounter for supervision of other normal pregnancy, first trimester | First |
| ICD-10-CM | Z3491 | Encounter for supervision of normal pregnancy, unspecified, first trimester | First |
| ICD-10-CM | Z3201 | Encounter for pregnancy test, result positive | NA |
| ICD-10-CM | O0901 | Supervision of pregnancy with history of infertility, first trimester | First |
| ICD-10-CM | O0911 | Supervision of pregnancy with history of ectopic pregnancy, first trimester | First |
| ICD-10-CM | O09A1 | Supervision of pregnancy with history of molar pregnancy, first trimester | First |
| ICD-10-CM | O09291 | Supervision of pregnancy with other poor reproductive or obstetric history, first trimester | First |
| ICD-10-CM | O0941 | Supervision of pregnancy with grand multiparity, first trimester | First |
| ICD-10-CM | O09211 | Supervision of pregnancy with history of pre-term labor, first trimester | First |
| ICD-10-CM | O09291 | Supervision of pregnancy with other poor reproductive or obstetric history, first trimester | First |
| ICD-10-CM | O0931 | Supervision of pregnancy with insufficient antenatal care, first trimester | First |
| ICD-10-CM | O09511 | Supervision of elderly primigravida, first trimester | First |
| ICD-10-CM | O09521 | Supervision of elderly multigravida, first trimester | First |
| ICD-10-CM | O09611 | Supervision of young primigravida, first trimester | First |
| ICD-10-CM | O09621 | Supervision of young multigravida, first trimester | First |
| ICD-10-CM | O09811 | Supervision of pregnancy resulting from assisted reproductive technology, first trimester | First |
| ICD-10-CM | O09821 | Supervision of pregnancy with history of in utero procedure during previous pregnancy, first trimester | First |
| ICD-10-CM | O0971 | Supervision of high risk pregnancy due to social problems, first trimester | First |
| ICD-10-CM | O09891 | Supervision of other high risk pregnancies, first trimester | First |
| ICD-10-CM | O0991 | Supervision of high risk pregnancy, unspecified, first trimester | First |
| ICD-10-CM | O0941 | Supervision of pregnancy with grand multiparity, first trimester | First |
| ICD-10-CM | O09511 | Supervision of elderly primigravida, first trimester | First |
| ICD-10-CM | O09521 | Supervision of elderly multigravida, first trimester | First |
| ICD-10-CM | Z3402 | Encounter for supervision of normal first pregnancy, second trimester | Second |
| ICD-10-CM | Z3482 | Encounter for supervision of other normal pregnancy, second trimester | Second |
| ICD-10-CM | Z3492 | Encounter for supervision of normal pregnancy, unspecified, second trimester | Second |
| ICD-10-CM | O0942 | Supervision of pregnancy with grand multiparity, second trimester | Second |
| ICD-10-CM | O09512 | Supervision of elderly primigravida, second trimester | Second |
| ICD-10-CM | O09522 | Supervision of elderly multigravida, second trimester | Second |
| ICD-10-CM | O0902 | Supervision of pregnancy with history of infertility, second trimester | Second |
| ICD-10-CM | O0912 | Supervision of pregnancy with history of ectopic pregnancy, second trimester | Second |
| ICD-10-CM | O09A2 | Supervision of pregnancy with history of molar pregnancy, second trimester | Second |
| ICD-10-CM | O0942 | Supervision of pregnancy with grand multiparity, second trimester | Second |
| ICD-10-CM | O09212 | Supervision of pregnancy with history of pre-term labor, second trimester | Second |
| ICD-10-CM | O09292 | Supervision of pregnancy with other poor reproductive or obstetric history, second trimester | Second |
| ICD-10-CM | O0932 | Supervision of pregnancy with insufficient antenatal care, second trimester | Second |
| ICD-10-CM | O09512 | Supervision of elderly primigravida, second trimester | Second |
| ICD-10-CM | O09522 | Supervision of elderly multigravida, second trimester | Second |
| ICD-10-CM | O09612 | Supervision of young primigravida, second trimester | Second |
| ICD-10-CM | O09622 | Supervision of young multigravida, second trimester | Second |
| ICD-10-CM | O09812 | Supervision of pregnancy resulting from assisted reproductive technology, second trimester | Second |
| ICD-10-CM | O09822 | Supervision of pregnancy with history of in utero procedure during previous pregnancy, second trimester | Second |
| ICD-10-CM | O0972 | Supervision of high risk pregnancy due to social problems, second trimester | Second |
| ICD-10-CM | O09892 | Supervision of other high risk pregnancies, second trimester | Second |
| ICD-10-CM | O0992 | Supervision of high risk pregnancy, unspecified, second trimester | Second |
| ICD-10-CM | Z363 | Encounter for antenatal screening for malformations-Screening for a suspected anomaly | NA |
| ICD-10-CM | Z3403 | Encounter for supervision of normal first pregnancy, third trimester | Third |
| ICD-10-CM | Z3483 | Encounter for supervision of other normal pregnancy, third trimester | Third |
| ICD-10-CM | Z3493 | Encounter for supervision of normal pregnancy, unspecified, third trimester | Third |
| ICD-10-CM | O0943 | Supervision of pregnancy with grand multiparity, third trimester | Third |
| ICD-10-CM | O09513 | Supervision of elderly primigravida, third trimester | Third |
| ICD-10-CM | O09523 | Supervision of elderly multigravida, third trimester | Third |
| ICD-10-CM | O0903 | Supervision of pregnancy with history of infertility, third trimester | Third |
| ICD-10-CM | O0913 | Supervision of pregnancy with history of ectopic pregnancy, third trimester | Third |
| ICD-10-CM | O09A3 | Supervision of pregnancy with history of molar pregnancy, third trimester | Third |
| ICD-10-CM | O0943 | Supervision of pregnancy with grand multiparity, third trimester | Third |
| ICD-10-CM | O09213 | Supervision of pregnancy with history of pre-term labor, third trimester | Third |
| ICD-10-CM | O09293 | Supervision of pregnancy with other poor reproductive or obstetric history, third trimester | Third |
| ICD-10-CM | O0933 | Supervision of pregnancy with insufficient antenatal care, third trimester | Third |
| ICD-10-CM | O09513 | Supervision of elderly primigravida, third trimester | Third |
| ICD-10-CM | O09523 | Supervision of elderly multigravida, third trimester | Third |
| ICD-10-CM | O09613 | Supervision of young primigravida, third trimester | Third |
| ICD-10-CM | O09623 | Supervision of young multigravida, third trimester | Third |
| ICD-10-CM | O09813 | Supervision of pregnancy resulting from assisted reproductive technology, third trimester | Third |
| ICD-10-CM | O09823 | Supervision of pregnancy with history of in utero procedure during previous pregnancy, third trimester | Third |
| ICD-10-CM | O0973 | Supervision of high risk pregnancy due to social problems, third trimester | Third |
| ICD-10-CM | O09893 | Supervision of other high risk pregnancies, third trimester | Third |
| ICD-10-CM | O0993 | Supervision of high risk pregnancy, unspecified, third trimester | Third |
| ICD-10-CM | Z3400 | Encounter for supervision of normal first pregnancy, unspecified trimester | Unspecified |
| ICD-10-CM | Z3490 | Encounter for supervision of normal pregnancy, unspecified, unspecified trimester | Unspecified |
| ICD-10-CM | Z3480 | Encounter for supervision of other normal pregnancy, unspecified trimester | Unspecified |
| ICD-10-CM | O09529 | Supervision of elderly multigravida, unspecified trimester | Unspecified |
| ICD-10-CM | O09519 | Supervision of elderly primigravida, unspecified trimester | Unspecified |
| ICD-10-CM | O0970 | Supervision of high risk pregnancy due to social problems, unspecified trimester | Unspecified |
| ICD-10-CM | O0990 | Supervision of high risk pregnancy, unspecified, unspecified trimester | Unspecified |
| ICD-10-CM | O09899 | Supervision of other high risk pregnancies, unspecified trimester | Unspecified |
| ICD-10-CM | O09819 | Supervision of pregnancy resulting from assisted reproductive technology, unspecified trimester | Unspecified |
| ICD-10-CM | O0940 | Supervision of pregnancy with grand multiparity, unspecified trimester | Unspecified |
| ICD-10-CM | O0910 | Supervision of pregnancy with history of ectopic pregnancy, unspecified trimester | Unspecified |
| ICD-10-CM | O09829 | Supervision of pregnancy with history of in utero procedure during previous pregnancy, unspecified trimester | Unspecified |
| ICD-10-CM | O0900 | Supervision of pregnancy with history of infertility, unspecified trimester | Unspecified |
| ICD-10-CM | O09A0 | Supervision of pregnancy with history of molar pregnancy, unspecified trimester | Unspecified |
| ICD-10-CM | O09219 | Supervision of pregnancy with history of pre-term labor, unspecified trimester | Unspecified |
| ICD-10-CM | O0930 | Supervision of pregnancy with insufficient antenatal care, unspecified trimester | Unspecified |
| ICD-10-CM | O09299 | Supervision of pregnancy with other poor reproductive or obstetric history, unspecified trimester | Unspecified |
| ICD-10-CM | O09629 | Supervision of young multigravida, unspecified trimester | Unspecified |
| ICD-10-CM | O09619 | Supervision of young primigravida, unspecified trimester | Unspecified |

NOTES:

1. The table includes an adaptation of ICD-9-CM/ICD-10-CM codes and descriptions which are publicly available for download at the following location: <ftp://ftp.cdc.gov/pub/Health_Statistics/NCHS/Publications/ICD9-CM/2011>

<ftp://ftp.cdc.gov/pub/Health_Statistics/NCHS/Publications/ICD10CM/2021/>

1. The decimal points in the codes are removed. Codes that have a trailing “x” imply all ICD-9-CM codes with similar initial digits were included in the algorithm and description of the code may vary for subclasses of the code.

eTable 11- Gestational age codes (ICD-9-CM, ICD-10-CM)

| Code Type | ICD10 Grouping | Code | GA in weeks | Code Description |
| --- | --- | --- | --- | --- |
| ICD-9-CM | NA | 765.21 | 23 | Less than 24 completed weeks of gestation |
| ICD-9-CM | NA | 765.22 | 24 | 24 completed weeks of gestation |
| ICD-9-CM | NA | 765.23 | 26 | 25 to 26 completed weeks of gestation |
| ICD-9-CM | NA | 765.24 | 28 | 27 to 28 completed weeks of gestation |
| ICD-9-CM | NA | 765.09 | 28 | Extreme immaturity, 2,500 grams and over |
| ICD-9-CM | NA | 765.08 | 28 | Extreme immaturity, 2,000-2,499 grams |
| ICD-9-CM | NA | 765.07 | 28 | Extreme immaturity, 1,750-1,999 grams |
| ICD-9-CM | NA | 765.06 | 28 | Extreme immaturity, 1,500-1,749 grams |
| ICD-9-CM | NA | 765.05 | 28 | Extreme immaturity, 1,250-1,499 grams |
| ICD-9-CM | NA | 765.04 | 28 | Extreme immaturity, 1,000-1,249 grams |
| ICD-9-CM | NA | 765.03 | 28 | Extreme immaturity, 750-999 grams |
| ICD-9-CM | NA | 765.02 | 28 | Extreme immaturity, 500-749 grams |
| ICD-9-CM | NA | 765.01 | 28 | Extreme immaturity, less than 500 grams |
| ICD-9-CM | NA | 765.00 | 28 | Extreme immaturity, unspecified [weight] |
| ICD-9-CM | NA | 765.0 | 28 | Disorders relating to extreme immaturity of infant |
| ICD-9-CM | NA | 765.25 | 30 | 29 to 30 completed weeks of gestation |
| ICD-9-CM | NA | 765.26 | 32 | 31 to 32 completed weeks of gestation |
| ICD-9-CM | NA | 765.27 | 34 | 33 to 34 completed weeks of gestation |
| ICD-9-CM | NA | 765.20 | 35 | Preterm, unspecified weeks of gestation |
| ICD-9-CM | NA | 765.19 | 35 | Other preterm infants, 2,500 grams and over |
| ICD-9-CM | NA | 765.18 | 35 | Other preterm infants, 2,000-2,499 grams |
| ICD-9-CM | NA | 765.17 | 35 | Other preterm infants, 1,750-1,999 grams |
| ICD-9-CM | NA | 765.16 | 35 | Other preterm infants, 1,500-1,749 grams |
| ICD-9-CM | NA | 765.15 | 35 | Other preterm infants, 1,250-1,499 grams |
| ICD-9-CM | NA | 765.14 | 35 | Other preterm infants, 1,000-1,249 grams |
| ICD-9-CM | NA | 765.13 | 35 | Other preterm infants, 750-999 grams |
| ICD-9-CM | NA | 765.12 | 35 | Other preterm infants, 500-749 grams |
| ICD-9-CM | NA | 765.11 | 35 | Other preterm infants, less than 500 grams |
| ICD-9-CM | NA | 765.10 | 35 | Other preterm infants, unspecified [weight] |
| ICD-9-CM | NA | 765.1 | 35 | Disorders relating to other preterm infants |
| ICD-9-CM | NA | 765 | 35 | Disorders relating to short gestation and low birthweight |
| ICD-9-CM | NA | 644.21 | 35 | Early onset of delivery, delivered, with or without mention of antepartum condition |
| ICD-9-CM | NA | 765.28 | 36 | 35 to 36 completed weeks of gestation |
| ICD-9-CM | NA | 766 | 40 | Disorders relating to long gestation and high birthweight |
| ICD-9-CM | NA | 765.29 | 39 | 37 or more completed weeks of gestation |
| ICD-9-CM | NA | 765.2 | 39 | Weeks of gestation |
| ICD-9-CM | NA | 766.2 | 40 | Late infant, not 'heavy-for-dates' |
| ICD-9-CM | NA | 645.13 | 40 | Post term pregnancy, antepartum condition or complication |
| ICD-9-CM | NA | 645.11 | 40 | Post term pregnancy, delivered, with or without mention of antepartum |
| ICD-9-CM | NA | 645.10 | 40 | post term pregnancy, unspecified as to episode of care or not applicable |
| ICD-9-CM | NA | 645.1 | 40 | Post-term pregnancy |
| ICD-9-CM | NA | 645 | 40 | Late pregnancy |
| ICD-9-CM | NA | 766.21 | 41 | Hypermaturity, Post-term infant (gestation period over 40 completed weeks to 42 completed weeks) |
| ICD-9-CM | NA | 645.23 | 41 | Prolonged pregnancy, antepartum condition or complication |
| ICD-9-CM | NA | 645.21 | 41 | Prolonged pregnancy, delivered, with or without mention of antepartum |
| ICD-9-CM | NA | 645.20 | 41 | Prolonged pregnancy, unspecified as to episode of care or not applicable |
| ICD-9-CM | NA | 645.2 | 41 | Prolonged pregnancy |
| ICD-9-CM | NA | 766.22 | 42 | Prolonged gestation of infant (period over 42 completed weeks) |
| ICD-10-CM | Type-2 | P07.21 | 23 | Extreme immaturity of newborn, gestational age less than 23 completed weeks |
| ICD-10-CM | Type-2 | O60.12X0 | 24 | Preterm labor second trimester with preterm delivery second trimester |
| ICD-10-CM | Type-2 | O60.12X1 | 24 | Preterm labor second trimester with preterm delivery second trimester |
| ICD-10-CM | Type-2 | O60.12X2 | 24 | Preterm labor second trimester with preterm delivery second trimester |
| ICD-10-CM | Type-2 | O60.12X3 | 24 | Preterm labor second trimester with preterm delivery second trimester |
| ICD-10-CM | Type-2 | O60.12X4 | 24 | Preterm labor second trimester with preterm delivery second trimester |
| ICD-10-CM | Type-2 | O60.12X5 | 24 | Preterm labor second trimester with preterm delivery second trimester |
| ICD-10-CM | Type-2 | O60.12X9 | 24 | Preterm labor second trimester with preterm delivery second trimester |
| ICD-10-CM | Type-2 | P07.01 | 31 | Other low birth weight newborn, unspecified weight |
| ICD-10-CM | Type-2 | P07.00 | 32 | Extremely low birth weight newborn, unspecified weight |
| ICD-10-CM | Type-2 | P07.02 | 32 | Extremely low birth weight newborn, 500-749 grams |
| ICD-10-CM | Type-2 | P07.03 | 32 | Extremely low birth weight newborn, 750-999 grams |
| ICD-10-CM | Type-2 | P07.14 | 32 | Other low birth weight newborn, 1000-1249 grams |
| ICD-10-CM | Type-2 | P07.15 | 32 | Other low birth weight newborn, 1250-1499 grams |
| ICD-10-CM | Type-2 | P07.16 | 32 | Other low birth weight newborn, 1500-1749 grams |
| ICD-10-CM | Type-2 | P07.17 | 32 | Other low birth weight newborn, 1750-1999 grams |
| ICD-10-CM | Type-2 | P07.18 | 32 | Other low birth weight newborn, 2000-2499 grams |
| ICD-10-CM | Type-2 | P07.30 | 33 | Preterm newborn, unspecified weeks of gestation |
| ICD-10-CM | Type-2 | O60.13X0 | 35 | Preterm labor second trimester with preterm delivery third trimester |
| ICD-10-CM | Type-2 | O60.13X1 | 35 | Preterm labor second trimester with preterm delivery third trimester |
| ICD-10-CM | Type-2 | O60.13X2 | 35 | Preterm labor second trimester with preterm delivery third trimester |
| ICD-10-CM | Type-2 | O60.13X3 | 35 | Preterm labor second trimester with preterm delivery third trimester |
| ICD-10-CM | Type-2 | O60.13X4 | 35 | Preterm labor second trimester with preterm delivery third trimester |
| ICD-10-CM | Type-2 | O60.13X5 | 35 | Preterm labor second trimester with preterm delivery third trimester |
| ICD-10-CM | Type-2 | O60.13X9 | 35 | Preterm labor second trimester with preterm delivery third trimester |
| ICD-10-CM | Type-2 | P07.10 | 35 | Other low birth weight newborn, unspecified weight |
| ICD-10-CM | Type-2 | P07.20 | 35 | Extreme immaturity of newborn, unspecified weeks of gestation |
| ICD-10-CM | Type-2 | O48.0 | 40 | Post-term pregnancy |
| ICD-10-CM | Type-2 | O48.1 | 41 | Prolonged pregnancy |
| ICD-10-CM | Type-2 | P08.21 | 41 | Post-term newborn |
| ICD-10-CM | Type-2 | P08.22 | 42 | Prolonged gestation of newborn |
| ICD-10-CM | Type-2 | Z3A.49 | 43 | Greater than 42 weeks gestation of pregnancy |
| ICD-10-CM | Type-2 | O60.14X9 | 35 | Preterm labor third trimester with preterm delivery third trimester |
| ICD-10-CM | Type-2 | O60.14X5 | 35 | Preterm labor third trimester with preterm delivery third trimester |
| ICD-10-CM | Type-2 | O60.14X4 | 35 | Preterm labor third trimester with preterm delivery third trimester |
| ICD-10-CM | Type-2 | O60.14X3 | 35 | Preterm labor third trimester with preterm delivery third trimester |
| ICD-10-CM | Type-2 | O60.14X2 | 35 | Preterm labor third trimester with preterm delivery third trimester |
| ICD-10-CM | Type-2 | O60.14X1 | 35 | Preterm labor third trimester with preterm delivery third trimester |
| ICD-10-CM | Type-2 | O60.14X0 | 35 | Preterm labor third trimester with preterm delivery third trimester |
| ICD-10-CM | Type-1 | P07.22 | 23 | Extreme immaturity of newborn, gestational age 23 completed weeks |
| ICD-10-CM | Type-1 | P07.23 | 24 | Extreme immaturity of newborn, gestational age 24 completed weeks |
| ICD-10-CM | Type-1 | P07.24 | 25 | Extreme immaturity of newborn, gestational age 25 completed weeks |
| ICD-10-CM | Type-1 | P07.25 | 26 | Extreme immaturity of newborn, gestational age 26 completed weeks |
| ICD-10-CM | Type-1 | P07.26 | 27 | Extreme immaturity of newborn, gestational age 27 completed weeks |
| ICD-10-CM | Type-1 | P07.31 | 28 | Preterm newborn, gestational age 28 completed weeks |
| ICD-10-CM | Type-1 | Z3A.20 | 20 | 20 weeks gestation of pregnancy |
| ICD-10-CM | Type-1 | Z3A.21 | 21 | 21 weeks gestation of pregnancy |
| ICD-10-CM | Type-1 | Z3A.22 | 22 | 22 weeks gestation of pregnancy |
| ICD-10-CM | Type-1 | Z3A.23 | 23 | 23 weeks gestation of pregnancy |
| ICD-10-CM | Type-1 | Z3A.24 | 24 | 24 weeks gestation of pregnancy |
| ICD-10-CM | Type-1 | Z3A.25 | 25 | 25 weeks gestation of pregnancy |
| ICD-10-CM | Type-1 | Z3A.26 | 26 | 26 weeks gestation of pregnancy |
| ICD-10-CM | Type-1 | Z3A.27 | 27 | 27 weeks gestation of pregnancy |
| ICD-10-CM | Type-1 | Z3A.28 | 28 | 28 weeks gestation of pregnancy |
| ICD-10-CM | Type-1 | Z3A.29 | 29 | 29 weeks gestation of pregnancy |
| ICD-10-CM | Type-1 | P07.32 | 29 | Preterm newborn, gestational age 29 completed weeks |
| ICD-10-CM | Type-1 | Z3A.30 | 30 | 30 weeks gestation of pregnancy |
| ICD-10-CM | Type-1 | P07.33 | 30 | Preterm newborn, gestational age 30 completed weeks |
| ICD-10-CM | Type-1 | Z3A.31 | 31 | 31 weeks gestation of pregnancy |
| ICD-10-CM | Type-1 | P07.34 | 31 | Preterm newborn, gestational age 31 completed weeks |
| ICD-10-CM | Type-1 | Z3A.32 | 32 | 32 weeks gestation of pregnancy |
| ICD-10-CM | Type-1 | P07.35 | 32 | Preterm newborn, gestational age 32 completed weeks |
| ICD-10-CM | Type-1 | Z3A.33 | 33 | 33 weeks gestation of pregnancy |
| ICD-10-CM | Type-1 | P07.36 | 33 | Preterm newborn, gestational age 33 completed weeks |
| ICD-10-CM | Type-1 | Z3A.34 | 34 | 34 weeks gestation of pregnancy |
| ICD-10-CM | Type-1 | P07.37 | 34 | Preterm newborn, gestational age 34 completed weeks |
| ICD-10-CM | Type-1 | Z3A.35 | 35 | 35 weeks gestation of pregnancy |
| ICD-10-CM | Type-1 | P07.38 | 35 | Preterm newborn, gestational age 35 completed weeks |
| ICD-10-CM | Type-1 | Z3A.36 | 36 | 36 weeks gestation of pregnancy |
| ICD-10-CM | Type-1 | P07.39 | 36 | Preterm newborn, gestational age 36 completed weeks |
| ICD-10-CM | Type-1 | Z3A.37 | 37 | 37 weeks gestation of pregnancy |
| ICD-10-CM | Type-1 | Z3A.38 | 38 | 38 weeks gestation of pregnancy |
| ICD-10-CM | Type-1 | Z3A.39 | 39 | 39 weeks gestation of pregnancy |
| ICD-10-CM | Type-1 | Z3A.40 | 40 | 40 weeks gestation of pregnancy |
| ICD-10-CM | Type-1 | Z3A.41 | 41 | 41 weeks gestation of pregnancy |
| ICD-10-CM | Type-1 | Z3A.42 | 42 | 42 weeks gestation of pregnancy |

NOTES:

1. The table includes an adaptation of ICD-9-CM/ICD-10-CM codes and descriptions which are publicly available for download at the following location: <ftp://ftp.cdc.gov/pub/Health_Statistics/NCHS/Publications/ICD9-CM/2011>

<ftp://ftp.cdc.gov/pub/Health_Statistics/NCHS/Publications/ICD10CM/2021/>

1. The gestational age attributed to ICD-9-CM codes are based on the following publication:

Zhu Y, Hampp C, Wang X, Albogami Y, Wei YJ, Brumback BA, Roussos-Ross D, Winterstein AG. Validation of algorithms to estimate gestational age at birth in the Medicaid Analytic eXtract-Quantifying the misclassification of maternal drug exposure during pregnancy. Pharmacoepidemiol Drug Saf. 2020 Sep 9. doi: 10.1002/pds.5126.

eTable 12- Washout period between pregnancy episodes

| First Pregnancy Category | Second Pregnancy Category | Minimum Days Between Outcomes |
| --- | --- | --- |
| Live birth | Live birth | 182 |
| Live birth | Stillbirth | 168 |
| Live birth | Unclassified Delivery | 168 |
| Live birth | Ectopic pregnancy | 70 |
| Live birth | Induced abortion | 70 |
| Live birth | Spontaneous abortion | 70 |
| Live birth | Pregnancy supervision and early screening | 75 |
| Stillbirth | Live birth | 182 |
| Stillbirth | Stillbirth | 168 |
| Stillbirth | Unclassified Delivery | 168 |
| Stillbirth | Ectopic pregnancy | 70 |
| Stillbirth | Induced abortion | 70 |
| Stillbirth | Spontaneous abortion | 70 |
| Stillbirth | Pregnancy supervision and early screening | 75 |
| Unclassified Delivery | Live birth | 182 |
| Unclassified Delivery | Stillbirth | 168 |
| Unclassified Delivery | Unclassified Delivery | 168 |
| Unclassified Delivery | Ectopic pregnancy | 70 |
| Unclassified Delivery | Induced abortion | 70 |
| Unclassified Delivery | Spontaneous abortion | 70 |
| Unclassified Delivery | Pregnancy supervision and early screening | 75 |
| Ectopic pregnancy | Live birth | 168 |
| Ectopic pregnancy | Stillbirth | 154 |
| Ectopic pregnancy | Unclassified Delivery | 154 |
| Ectopic pregnancy | Ectopic pregnancy | 56 |
| Ectopic pregnancy | Induced abortion | 56 |
| Ectopic pregnancy | Spontaneous abortion | 56 |
| Ectopic pregnancy | Pregnancy supervision and early screening | 75 |
| Induced abortion | Live birth | 168 |
| Induced abortion | Stillbirth | 154 |
| Induced abortion | Unclassified Delivery | 154 |
| Induced abortion | Ectopic pregnancy | 56 |
| Induced abortion | Induced abortion | 56 |
| Induced abortion | Spontaneous abortion | 56 |
| Induced abortion | Pregnancy supervision and early screening | 75 |
| Spontaneous abortion | Live birth | 168 |
| Spontaneous abortion | Stillbirth | 154 |
| Spontaneous abortion | Unclassified Delivery | 154 |
| Spontaneous abortion | Ectopic pregnancy | 56 |
| Spontaneous abortion | Induced abortion | 56 |
| Spontaneous abortion | Spontaneous abortion | 56 |
| Spontaneous abortion | Pregnancy supervision and early screening | 75 |
| Pregnancy supervision and early screening | Pregnancy supervision and early screening | 182 |

Reference:

Matcho A, Ryan P, Fife D, Gifkins D, Knoll C, Friedman A. Inferring pregnancy episodes and outcomes within a network of observational databases. PLoS One. 2018;13(2):e0192033.

eTable - Pregnancy episodes identified by the Pregnancy Identification Algorithm (PIA)

| **Endpoint Type** | **2006** | **2007** | **2008** | **2009** | **2010** | **2011** | **2012** | **2013** | **2014** | **2015** | **2016** | **2017** | **Total** |
| --- | --- | --- | --- | --- | --- | --- | --- | --- | --- | --- | --- | --- | --- |
| **Full-term** | 286,021 | 314,830 | 441,934 | 473,208 | 449,537 | 488,753 | 497,994 | 398,795 | 423,069 | 258,554 | 247,874 | 229,363 | 4,509,932 |
| % | 66.24% | 66.05% | 64.50% | 63.69% | 64.88% | 65.11% | 62.41% | 64.62% | 60.63% | 64.68% | 62.27% | 61.99% | 63.9% |
| **Pre-term** | 27,040 | 30,850 | 44,672 | 47,340 | 44,362 | 47,087 | 46,920 | 37,126 | 39,035 | 25,180 | 25,552 | 24,069 | 439,233 |
| % | 6.26% | 6.47% | 6.52% | 6.37% | 6.40% | 6.27% | 5.88% | 6.02% | 5.59% | 6.30% | 6.42% | 6.51% | 6.2% |
| **Post-term** | 843 | 1,237 | 2,023 | 2,229 | 2,203 | 2,527 | 2,547 | 2,534 | 3,193 | 4,812 | 12,502 | 11,632 | 48,282 |
| % | 0.20% | 0.26% | 0.30% | 0.30% | 0.32% | 0.34% | 0.32% | 0.41% | 0.46% | 1.20% | 3.14% | 3.14% | 0.7% |
| **Ectopic pregnancy** | 4,102 | 4,474 | 6,346 | 7,088 | 6,745 | 7,421 | 7,561 | 6,054 | 6,515 | 4,189 | 4,248 | 4,133 | 68,876 |
| % | 0.95% | 0.94% | 0.93% | 0.95% | 0.97% | 0.99% | 0.95% | 0.98% | 0.93% | 1.05% | 1.07% | 1.12% | 1.0% |
| **Stillbirth** | 3,620 | 3,747 | 5,262 | 5,699 | 5,580 | 6,014 | 6,062 | 4,815 | 5,140 | 3,235 | 3,212 | 3,067 | 55,453 |
| % | 0.84% | 0.79% | 0.77% | 0.77% | 0.81% | 0.80% | 0.76% | 0.78% | 0.74% | 0.81% | 0.81% | 0.83% | 0.8% |
| **Spontaneous abortion** | 62,671 | 68,202 | 96,520 | 102,631 | 97,664 | 107,089 | 111,191 | 87,426 | 92,280 | 57,809 | 56,424 | 53,638 | 993,545 |
| % | 14.52% | 14.31% | 14.09% | 13.81% | 14.09% | 14.27% | 13.93% | 14.17% | 13.23% | 14.46% | 14.17% | 14.50% | 14.1% |
| **Induced abortion** | 19,984 | 21,739 | 40,900 | 36,257 | 32,892 | 35,392 | 34,200 | 30,077 | 29,787 | 16,485 | 15,471 | 14,825 | 328,009 |
| % | 4.63% | 4.56% | 5.97% | 4.88% | 4.75% | 4.72% | 4.29% | 4.87% | 4.27% | 4.12% | 3.89% | 4.01% | 4.6% |
| **Unknown outcome** | 27,483 | 31,600 | 47,484 | 68,490 | 53,928 | 56,318 | 91,455 | 50,345 | 98,715 | 29,481 | 32,771 | 29,275 | 617,345 |
| % | 6.37% | 6.63% | 6.93% | 9.22% | 7.78% | 7.50% | 11.46% | 8.16% | 14.15% | 7.37% | 8.23% | 7.91% | 8.7% |
| **Denominator** a | 431,764 | 476,679 | 685,141 | 742,942 | 692,911 | 750,601 | 797,930 | 617,172 | 697,734 | 399,745 | 398,054 | 370,002 | 7,060,675 |

a The denominator is the total number of pregnancies observed in each year, and no continuous health plan enrollment is required for the pregnancy episodes.

eTable - The demographic characteristics of the eligible cohort

| **Variable** a | **2006** | **2007** | **2008** | **2009** | **2010** | **2011** | **2012** | **2013** | **2014** | **2015** | **2016** | **2017** |
| --- | --- | --- | --- | --- | --- | --- | --- | --- | --- | --- | --- | --- |
| **Age** |  |  |  |  |  |  |  |  |  |  |  |  |
| mean (SD) | 30.0 (6.0) | 29.8 (6.0) | 29.9 (6.0) | 30.0 (5.9) | 30.0 (5.8) | 30.0 (5.9) | 29.9 (5.9) | 30.0 (5.9) | 30.1 (5.8) | 30.1 (5.8) | 30.7 (5.7) | 30.9 (5.7) |
| median (IQR) | 30 (8.0) | 30 (8.0) | 30 (8.0) | 30 (8.0) | 30 (8.0) | 30 (8.0) | 30 (8.0) | 30 (8.0) | 30 (8.0) | 30 (8.0) | 31.0 (8.0) | 31.0 (8.0) |
| **Health Plan** |  |  |  |  |  |  |  |  |  |  |  |  |
| COMP | 3.9 | 1.8 | 1.2 | 0.8 | 0.8 | 0.6 | 0.6 | 0.9 | 1.1 | 1.6 | 1.9 | 2.2 |
| EPO | 0.6 | 1.0 | 1.2 | 1.4 | 3.1 | 2.7 | 1.5 | 1.4 | 1.2 | 0.6 | 0.7 | 0.8 |
| HMO | 25.7 | 26.4 | 24.9 | 20.2 | 18.1 | 17.1 | 15.0 | 15.8 | 12.3 | 10.6 | 10.7 | 11.6 |
| Non-Cap POS | 11.8 | 11.0 | 9.7 | 8.3 | 7.5 | 7.7 | 7.0 | 7.4 | 5.9 | 6.0 | 6.6 | 6.6 |
| PPO | 53.5 | 55.7 | 58.6 | 64.3 | 62.8 | 63.4 | 67.6 | 60.6 | 60.7 | 61.1 | 58.0 | 52.6 |
| Cap POS | 1.6 | 1.2 | 0.9 | 0.6 | 0.5 | 0.6 | 0.4 | 0.7 | 0.6 | 0.5 | 0.5 | 0.7 |
| CDHP | 2.8 | 2.9 | 2.9 | 3.1 | 4.7 | 4.9 | 4.4 | 7.7 | 11.0 | 11.8 | 11.8 | 14.1 |
| HDHP | 0.0 | 0.0 | 0.8 | 1.5 | 2.5 | 2.9 | 3.5 | 5.6 | 7.2 | 7.9 | 9.9 | 11.5 |
| **Beneficiary status** |  |  |  |  |  |  |  |  |  |  |  |  |
| Employee | 48.0 | 49.4 | 51.3 | 51.8 | 52.5 | 51.4 | 49.3 | 48.7 | 49.0 | 49.9 | 50.4 | 50.7 |
| Spouse | 44.7 | 43.0 | 41.3 | 41.4 | 40.5 | 39.0 | 38.2 | 37.6 | 37.2 | 36.4 | 36.5 | 36.4 |
| Child/Other | 7.4 | 7.6 | 7.4 | 6.8 | 7.0 | 9.6 | 12.5 | 13.7 | 13.8 | 13.8 | 13.1 | 12.9 |
| **Residence region** |  |  |  |  |  |  |  |  |  |  |  |  |
| North East | 12.7 | 12.4 | 12.4 | 14.7 | 18.8 | 18.7 | 18.4 | 18.3 | 18.5 | 17.6 | 16.8 | 17.5 |
| North Central | 22.9 | 22.5 | 24.8 | 26.2 | 24.4 | 23.0 | 22.5 | 21.6 | 21.6 | 19.9 | 20.2 | 20.3 |
| South | 45.7 | 47.0 | 43.1 | 38.3 | 36.6 | 36.7 | 37.1 | 34.3 | 37.4 | 43.2 | 44.5 | 45.2 |
| West | 18.1 | 17.6 | 18.2 | 18.9 | 20.0 | 20.2 | 20.7 | 23.8 | 20.3 | 18.9 | 18.5 | 17.0 |
| Unknown | 0.6 | 0.5 | 1.4 | 1.9 | 0.3 | 1.4 | 1.3 | 1.9 | 2.2 | 0.3 | 0.1 | 0.1 |

a The values in health plan, beneficiary status and residence region rows are percentages.

Abbreviations: COMP: Comprehensive, EPO: Exclusive Provider Organization, HMO: Health Maintenance Organization, Non-Cap POS: Non-Capitated Point-of-Service, PPO: Preferred Provider Organization, Cap POS: Capitated or Partially Capitated Point-of-Service, CDHP: Consumer Driven Health Plan, HDHP: High Deductible Health Plan

eTable - Pregnancy episodes identified by the Pregnancy Identification Algorithm (PIA) with standardized denominator

| **Endpoint Type a** | **2006** | **2007** | **2008** | **2009** | **2010** | **2011** | **2012** | **2013** | **2014** | **2015** | **2016** | **2017** |
| --- | --- | --- | --- | --- | --- | --- | --- | --- | --- | --- | --- | --- |
| **Full-term** | 286,021 | 314,830 | 441,934 | 473,208 | 449,537 | 488,753 | 497,994 | 398,795 | 423,069 | 258,554 | 247,874 | 229,363 |
| % | 5.22% | 5.14% | 4.81% | 4.56% | 4.48% | 4.51% | 4.61% | 4.52% | 4.73% | 3.82% | 3.73% | 3.63% |
| **Pre-term** | 27,040 | 30,850 | 44,672 | 47,340 | 44,362 | 47,087 | 46,920 | 37,126 | 39,035 | 25,180 | 25,552 | 24,069 |
| % | 0.49% | 0.50% | 0.49% | 0.46% | 0.44% | 0.43% | 0.43% | 0.42% | 0.44% | 0.37% | 0.38% | 0.38% |
| **Post-term** | 843 | 1,237 | 2,023 | 2,229 | 2,203 | 2,527 | 2,547 | 2,534 | 3,193 | 4,812 | 12,502 | 11,632 |
| % | 0.02% | 0.02% | 0.02% | 0.02% | 0.02% | 0.02% | 0.02% | 0.03% | 0.04% | 0.07% | 0.19% | 0.18% |
| **Ectopic pregnancy** | 4,102 | 4,474 | 6,346 | 7,088 | 6,745 | 7,421 | 7,561 | 6,054 | 6,515 | 4,189 | 4,248 | 4,133 |
| % | 0.07% | 0.07% | 0.07% | 0.07% | 0.07% | 0.07% | 0.07% | 0.07% | 0.07% | 0.06% | 0.06% | 0.07% |
| **Stillbirth** | 3,620 | 3,747 | 5,262 | 5,699 | 5,580 | 6,014 | 6,062 | 4,815 | 5,140 | 3,235 | 3,212 | 3,067 |
| % | 0.07% | 0.06% | 0.06% | 0.05% | 0.06% | 0.06% | 0.06% | 0.05% | 0.06% | 0.05% | 0.05% | 0.05% |
| **Spontaneous abortion** | 62,671 | 68,202 | 96,520 | 102,631 | 97,664 | 107,089 | 111,191 | 87,426 | 92,280 | 57,809 | 56,424 | 53,638 |
| % | 1.14% | 1.11% | 1.05% | 0.99% | 0.97% | 0.99% | 1.03% | 0.99% | 1.03% | 0.85% | 0.85% | 0.85% |
| **Induced abortion** | 19,984 | 21,739 | 40,900 | 36,257 | 32,892 | 35,392 | 34,200 | 30,077 | 29,787 | 16,485 | 15,471 | 14,825 |
| % | 0.37% | 0.36% | 0.45% | 0.35% | 0.33% | 0.33% | 0.32% | 0.34% | 0.33% | 0.24% | 0.23% | 0.23% |
| **Unknown outcome** | 27,483 | 31,600 | 47,484 | 68,490 | 53,928 | 56,318 | 91,455 | 50,345 | 98,715 | 29,481 | 32,771 | 29,275 |
| % | 0.50% | 0.52% | 0.52% | 0.66% | 0.54% | 0.52% | 0.85% | 0.57% | 1.10% | 0.44% | 0.49% | 0.46% |
| **Denominator** b | 5,474,297 | 6,122,444 | 9,180,591 | 10,373,293 | 10,044,634 | 10,840,700 | 10,803,022 | 8,823,023 | 8,935,396 | 6,776,164 | 6,647,423 | 6,326,121 |

a No continuous health plan enrollment is required for the identified pregnancy episodes.

b The denominator is the number of female beneficiaries with age 12-55 and a minimum of 45 weeks of health plan eligibility in each year.
